# **The sulfur cycle connects microbiomes and biogeochemistry in deep-sea hydrothermal plumes**

Zhichao Zhou<sup>1</sup>, Patricia Q. Tran<sup>1,2</sup>, Alyssa M. Adams<sup>1</sup>, Kristopher Kieft<sup>1,3</sup>, John A. Breier<sup>4</sup>, Rupesh K. Sinha<sup>5</sup>, Kottekkatu P. Krishnan<sup>5</sup>, P. John Kurian<sup>5</sup>, Caroline S. Fortunato<sup>6</sup>, Cody S. Sheik<sup>7</sup>, Julie A. Huber<sup>8</sup>, Meng Li<sup>9,10</sup>, Gregory J. Dick<sup>11,12</sup>, Karthik Anantharaman<sup>1,\*</sup>

<sup>1</sup> Department of Bacteriology, University of Wisconsin–Madison, Madison, WI, 53706, USA

<sup>2</sup> Department of Integrative Biology, University of Wisconsin–Madison, Madison, WI, 53706, USA

<sup>3</sup> Microbiology Doctoral Training Program, University of Wisconsin–Madison, Madison, WI, 53706, USA

<sup>4</sup> School of Earth, Environmental, and Marine Sciences, The University of Texas Rio Grande Valley, TX, 78539, USA

<sup>5</sup> National Center for Polar and Ocean Research, Ministry of Earth Sciences, Head land Sada, Vasco da Gama, Goa, 403804, India

<sup>6</sup> Department of Biology, Widener University, Chester, PA, 19013, USA

<sup>7</sup> Department of Biology and Large Lakes Observatory, University of Minnesota Duluth, Duluth, MN, 55812, USA

<sup>8</sup> Marine Chemistry and Geochemistry, Woods Hole Oceanographic Institution, Woods Hole, MA, 02543, USA

<sup>9</sup> Archaeal Biology Center, Institute for Advanced Study, Shenzhen University, Shenzhen, 518060, China

<sup>10</sup> Shenzhen Key Laboratory of Marine Microbiome Engineering, Institute for Advanced Study, Shenzhen University, Shenzhen 518060, China

<sup>11</sup> Department of Earth and Environmental Sciences, University of Michigan, Ann Arbor, MI, 48109, USA

<sup>12</sup> Cooperative Institute for Great Lakes Research, University of Michigan, Ann Arbor, MI, 48109, USA

\*Correspondence and requests for materials should be addressed to K.A. (email: [karthik@bact.wisc.edu](mailto:karthik@bact.wisc.edu))

34 **Abstract**

35 In globally distributed deep-sea hydrothermal vent plumes, microbiomes are shaped by the redox  
36 energy landscapes created by reduced hydrothermal vent fluids mixing with oxidized seawater. Plumes  
37 can disperse over thousands of kilometers and are complex. Their characteristics are determined by  
38 geochemical sources from hydrothermal vents, e.g., hydrothermal inputs, nutrients, and trace metals.  
39 However, the impacts of plume biogeochemistry on the oceans are poorly constrained due to a lack of  
40 integrated understanding of microbiomes, population genetics, and geochemistry. Here, we use  
41 microbial genomes to understand links between biogeography, evolution, and metabolic connectivity,  
42 and elucidate their impacts on biogeochemical cycling in the deep sea. Using data from 37 diverse  
43 plumes from 8 ocean basins, we show that sulfur metabolism defines the core microbiome of plumes  
44 and drives metabolic connectivity. Amongst all microbial metabolisms, sulfur transformations had the  
45 highest MW-score, a measure of metabolic connectivity in microbial communities. Our findings  
46 provide the ecological and evolutionary basis of change in sulfur-driven microbial communities and  
47 their population genetics in adaptation to changing geochemical gradients in the oceans.

## 48 **Main**

49 Hydrothermal vents are abundant and widely distributed across the deep oceans. The mixing of hot  
50 hydrothermally-derived fluids rich in reduced elements, compounds, and gasses, with cold seawater  
51 forms hydrothermal plumes<sup>1, 2</sup>. Usually, plumes rise up to hundreds of meters from the seafloor and  
52 can disperse over hundreds to thousands of kilometers through the pelagic oceans<sup>3</sup>. Surrounding  
53 microbes migrate into the plume and thrive on substantial reductants as the energy sources, making  
54 plumes ‘hotspots’ of microbial activity and geochemical transformations<sup>1, 2</sup>. Plumes constitute a  
55 relatively closed ecosystem that depends on chemical energy-based primary production and is mostly  
56 removed from receiving inputs of energy from the outside<sup>4, 5</sup>. Thus, plumes serve as an ideal natural  
57 bioreactor to study the processes and links between microbiome and biogeochemistry and the  
58 underlying ecological and evolutionary basis of microbial adaptation to contrasting conditions between  
59 energy-rich plumes and the energy-starved deep-sea<sup>2</sup>.

60  
61 The most abundant energy substrates for microorganisms in hydrothermal plumes include reduced  
62 sulfur compounds, hydrogen, ammonia, methane, and iron<sup>2</sup>. Amongst these, sulfur is a major energy  
63 substrate for diverse microorganisms in plumes across the globe<sup>2, 6, 7, 8</sup>. Sulfur transformations in  
64 plumes are dominated by oxidation of reduced sulfur species, primarily hydrogen sulfide and elemental  
65 sulfur. The metabolic pathways include oxidation of sulfide to elemental sulfur (*fcc*, *sqr*), oxidation of  
66 sulfur to sulfite (*dsr*, *sor*, and *sdo*), disproportionation of thiosulfate (*phs*) to hydrogen sulfide and  
67 sulfite, disproportionation of thiosulfate to elemental sulfur and sulfate (*sox*), thiosulfate oxidation to  
68 sulfate (*sox*, *tst*, and *glpE*), and sulfite oxidation to sulfate (*sat*, *apr*)<sup>7, 9, 10, 11</sup>. Complete oxidation of  
69 sulfur would involve oxidation of hydrogen sulfide all the way to sulfate. However, recent observations  
70 in other ecosystems indicate that individual microbes rarely possess a full set of the complete  
71 sulfide/sulfur oxidation pathway<sup>10, 12</sup>, instead individual steps are distributed across different  
72 community members. This likely suggests that sulfur oxidation is a microbial community-driven  
73 process that is dependent on metabolic interactions, and asks for revisiting sulfur metabolism and  
74 biogeochemistry based on a holistic perspective of the entire community.

75  
76 Recent microbiome-based ecological studies have focused on elucidating a genome-centric view of  
77 ecology and biogeochemistry<sup>7, 10, 12, 13, 14, 15</sup>. This approach has expanded our understanding of  
78 microbial diversity associated with specific energy metabolisms, including sulfur transformations in  
79 hydrothermal plumes, the deep sea, and beyond<sup>7, 14, 16, 17, 18, 19</sup>. However, the dynamics and  
80 microdiversity of the plume microbiome, and relevant biogeochemical impacts remain relatively  
81 underexplored<sup>20, 21, 22, 23, 24</sup>. Understanding how environmental constraints and selection shape the  
82 microdiversity and the genetic structure of plume microbial populations after migration from  
83 background seawater can provide fundamental insights into adaptation mechanisms. These insights  
84 can also inform future predictions of microbial responses to the changing oceans.

85  
86 Here, we characterized the ecological and evolutionary bases of the assembly of the plume microbiome,  
87 and their strategies for sulfur cycling-based energy metabolisms. First, we studied globally distributed  
88 hydrothermal plume datasets to define a core plume microbiome. We followed this up with synthesis  
89 of genome-resolved metagenomics, metatranscriptomics, and geochemistry from three hydrothermal

90 vent sites (Guaymas Basin, Mid-Cayman Rise, and Lau Basin) to unravel community structure and  
91 functional links to biogeochemistry, metabolic connectivity within plume and deep-sea communities,  
92 and microdiversity in abundant microbial populations. We demonstrate that plume microbiomes have  
93 a distinctive community composition and function, that is adapted towards energy conservation,  
94 metabolic interactions, and stress response.

## 95 **Results**

96 We used publicly available microbiome data from hydrothermal vent plumes across the globe to (1)  
97 define the core plume microbiome, (2) investigate plume microbiome structure, function, and activity,  
98 and (3) identify links between plume microbiomes and geochemistry. To investigate the core  
99 microbiome, we studied publicly available 16S rRNA gene datasets of hydrothermal plumes ( $n = 37$ )  
100 and background deep-sea samples ( $n = 14$ ) from eight ocean basins across the globe. To study the  
101 microbiome structure, function, and activity, we reconstructed metagenome-assembled genomes  
102 (MAGs) from three hydrothermal vent sites (containing both plume and background samples from  
103 Guaymas Basin, Mid-Cayman Rise, and Lau Basin). We also mapped paired metatranscriptomes from  
104 the same sites for some samples ([Fig. 1](#), [Fig. S1](#), and [Supplementary Data 1](#)). To study links between  
105 biogeochemistry and the microbiome, we analyzed paired geochemical data from the above three  
106 hydrothermal vent sites. To provide clarity on the plume and background samples, and DNA/cDNA  
107 libraries used in this study, we provided a schematic diagram describing the locations of all samples in  
108 the context of a hydrothermal vent system ([Fig. S1](#)).

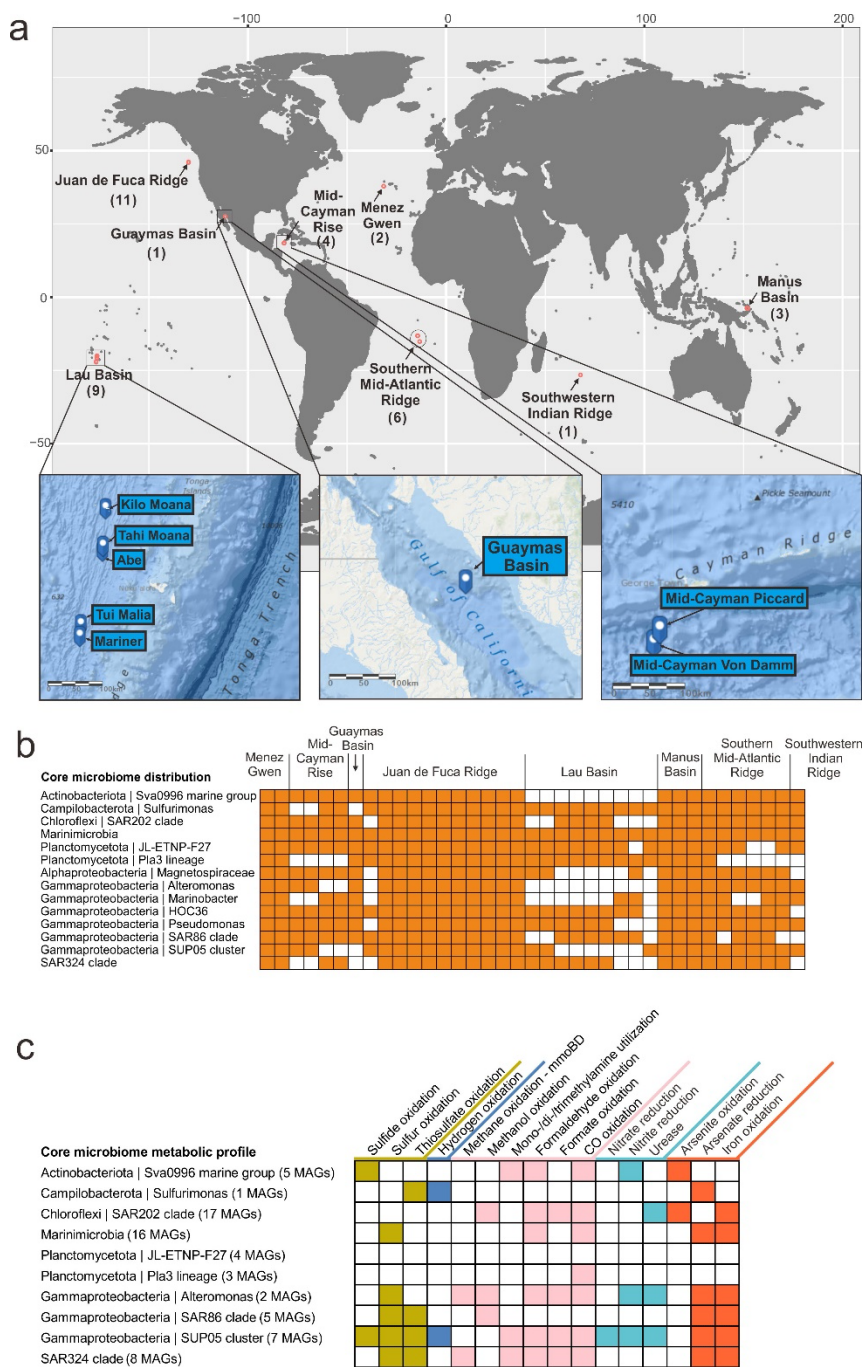

**Fig. 1 | Sampling sites, distribution, and metabolic profile of the core plume microbiome.** **a** Sampling site maps of hydrothermal plume samples from which the 16S rRNA gene datasets were sourced. Numbers in brackets indicate dataset quantities. Three hydrothermal sites that have metagenome and metatranscriptome datasets in this study were specifically represented by inset maps. Ocean maps were remodified from ArcGIS online map (containing layers of “World Ocean Base” and “World Ocean Reference”; <https://www.arcgis.com/>). **b** Membership and distribution of the core plume microbiome. Heatmap shows the presence/absence of core plume microbial groups (tracing back to known taxonomic ranks from the genus-level taxa) in 37 hydrothermal plume 16S rRNA gene datasets across the world. **c** Metabolic profile of the core plume microbiome. From this study, MAGs that have 16S rRNA genes affiliated to the core plume microbiome were used as representatives (numbers labeled in brackets). This subpanel shows the presence or absence of metabolic potential associated with sulfur, carbon, nitrogen, hydrogen, and metal biogeochemical transformations.

109

110

## 111 Defining the core hydrothermal plume microbiome

112 To identify and study the core hydrothermal plume microbiome, we used 16S rRNA gene datasets from  
 113 51 hydrothermal plume and background deep-sea samples spread across eight ocean basins  
 114 (Supplementary Data 2). Biogeographic patterns were delineated by Unifrac metrics of distance and  
 115 PCoA-based ordination. Sample location had a stronger influence on biogeographic patterns than  
 116 sample characteristics (plume/background) (Fig. S2, S3). Unweighted Unifrac PCoA plots indicated  
 117 that paired plume/background deep-sea samples within the same site were closely correlated (Fig. S3).  
 118 As revealed previously<sup>2, 25, 26</sup>, this supports the understanding that the hydrothermal plume  
 119 environment has its main constitutional microorganisms derived from surrounding seawaters, with

120 dispersal limitation having little effects locally.

121

122 We then identified genus-level taxa significantly distributed in plumes with high prevalence and  
123 relative abundance. The core plume microbiome consists of 14 microbial groups (Fig. 1a, b) as  
124 revealed from the 37 plume datasets with a cutoff of being distributed in at least two third of all plume  
125 datasets and having at least 1% relative abundance on average. By choosing MAGs reconstructed from  
126 this study that were affiliated to the same taxa, we characterized metabolic profiles for the core plume  
127 microbiome which demonstrated highly versatile metabolic potential for utilizing various plume  
128 substrates<sup>2</sup>, including HS<sup>-</sup>, S<sup>0</sup>, H<sub>2</sub>, CH<sub>4</sub>, methyl-/C<sub>1</sub> carbohydrates, arsenite, and iron (Fig. 1c). Most  
129 plume microorganisms are of seawater origin, consistent with prior reports<sup>26</sup> (Supplementary Table 1).  
130 We also observed a small number of seafloor/subsurface dwelling and endosymbiotic microorganisms  
131 that might be entrained in plumes<sup>2, 27</sup> (Supplementary Table 1). Collectively, our data suggest that  
132 sulfur and other reduced organic/inorganic compounds significantly shape the global core plume  
133 microbiome that are originally derived from the surrounding seawater.

134

### 135 **Distinctive plume geochemistries influence energy landscapes and promote microbial** 136 **growth**

137 Previous thermodynamic modeling analyses have reflected energy landscapes for various  
138 hydrothermal ecosystems<sup>4, 7, 10, 16</sup> by representing free energy yields for reactions of various energy  
139 sources for microbial metabolism in hydrothermal fluids. Some of them have demonstrated the  
140 consistency of thermodynamic modeling and omics-based biogeochemical estimation in individual  
141 ecosystems<sup>7, 10, 16</sup>. Here based on geochemical parameters and predicted functions from reconstructed  
142 MAGs (Fig. S4, S5, and Supplementary Data 3), we conducted an across-site comparison of  
143 thermodynamic modeling and omics-based biogeochemical estimations to reflect the influences of  
144 distinctive plume geochemical characteristics on plume microbes. We also conducted growth rate  
145 analyses to identify whether microbial energy contributors are promoted with higher growth rates in  
146 responding to differing geochemical conditions across plumes. To address these, we first reconstructed  
147 plume energy landscapes through thermodynamic modeling (Fig. 2a).

148

149 Distinctive geochemical characteristics support the predicted energy landscapes when compared  
150 among sites. Methane was the highest in end-member fluids from Guaymas Basin (63.4 mmol/kg)<sup>7</sup>,  
151 which supported the dominance of methane oxidation in the Guaymas Basin plume in the  
152 thermodynamic model (Fig. 2a), and significant contributions of methane oxidation in metagenomics  
153 datasets were also found (~40.5%) (Fig. 2b). Meanwhile, Lau Basin hydrothermal fluids had high Mn  
154 and Fe concentrations (Mn: 3.9-6.3 mmol/kg, Fe: 3.8-13.1 mmol/kg)<sup>28, 29</sup> in the Mariner hydrothermal  
155 field compared to other samples. This manifested in Fe and Mn oxidation contributing the highest  
156 fractions (Mn: ~4-5%, Fe: 13%) in thermodynamic modeling (Fig. 2a) and the highest fractions (Mn:  
157 0.3-6.4%, Fe: 6.7-66.6%) in omics-based estimations of Mariner among all sites (Fig. 2b). Similarly  
158 in Mid-Cayman Rise, high hydrogen concentrations in the vent fluids were associated with high  
159 contribution of hydrogen oxidation in the model, and in omics-based estimations (Fig. 2a, 2b,  
160 Supplementary Table 2). Overall, reduced sulfur is the major energy source as reflected in both  
161 thermodynamic modeling and omics-based biogeochemical estimations in all three sites. However,

162 individual plume geochemical conditions vary with diverse minor energy sources, such as iron,  
163 methane, and hydrogen, leading to different energy landscapes which are mediated by microbes.

164

165 To study whether abundant organisms conducting biogeochemical transformations in each site were  
166 also growing actively, we predicted microbial growth rates from metagenomic data using iRep<sup>30</sup>. iRep  
167 can use a combination of cumulative GC skews and abundance of metagenomic reads to calculate the  
168 difference in read abundance at the origin and terminus of a genome which is a proxy for the replication  
169 or growth rate of organism<sup>30, 31, 32</sup>. The results suggest potential associations between growth rates and  
170 geochemically-influenced energy landscapes for individual sites (Fig. 2c). A consistent pattern of the  
171 abundant microorganisms in plumes having a higher predicted growth rate was also observed in certain  
172 sites. For instance, LS-SOB and Thiomicrospirales both had the capacities for sulfur and iron oxidation,  
173 and were predicted to have a higher growth rate than other microorganisms in Guaymas Basin plume  
174 (Fig. 2c). Similarly, Methylococcales and Chromatiales were the major contributors to iron, methane,  
175 and sulfur oxidation in Lau Basin (Abe plume) and their growth rates were higher than other organisms  
176 (Fig. 2c). Collectively, we found a consistent pattern demonstrating that the abundant microorganisms  
177 also have higher predicted growth rates potentially due to their ability to respond to varying  
178 geochemistry in hydrothermal plumes.

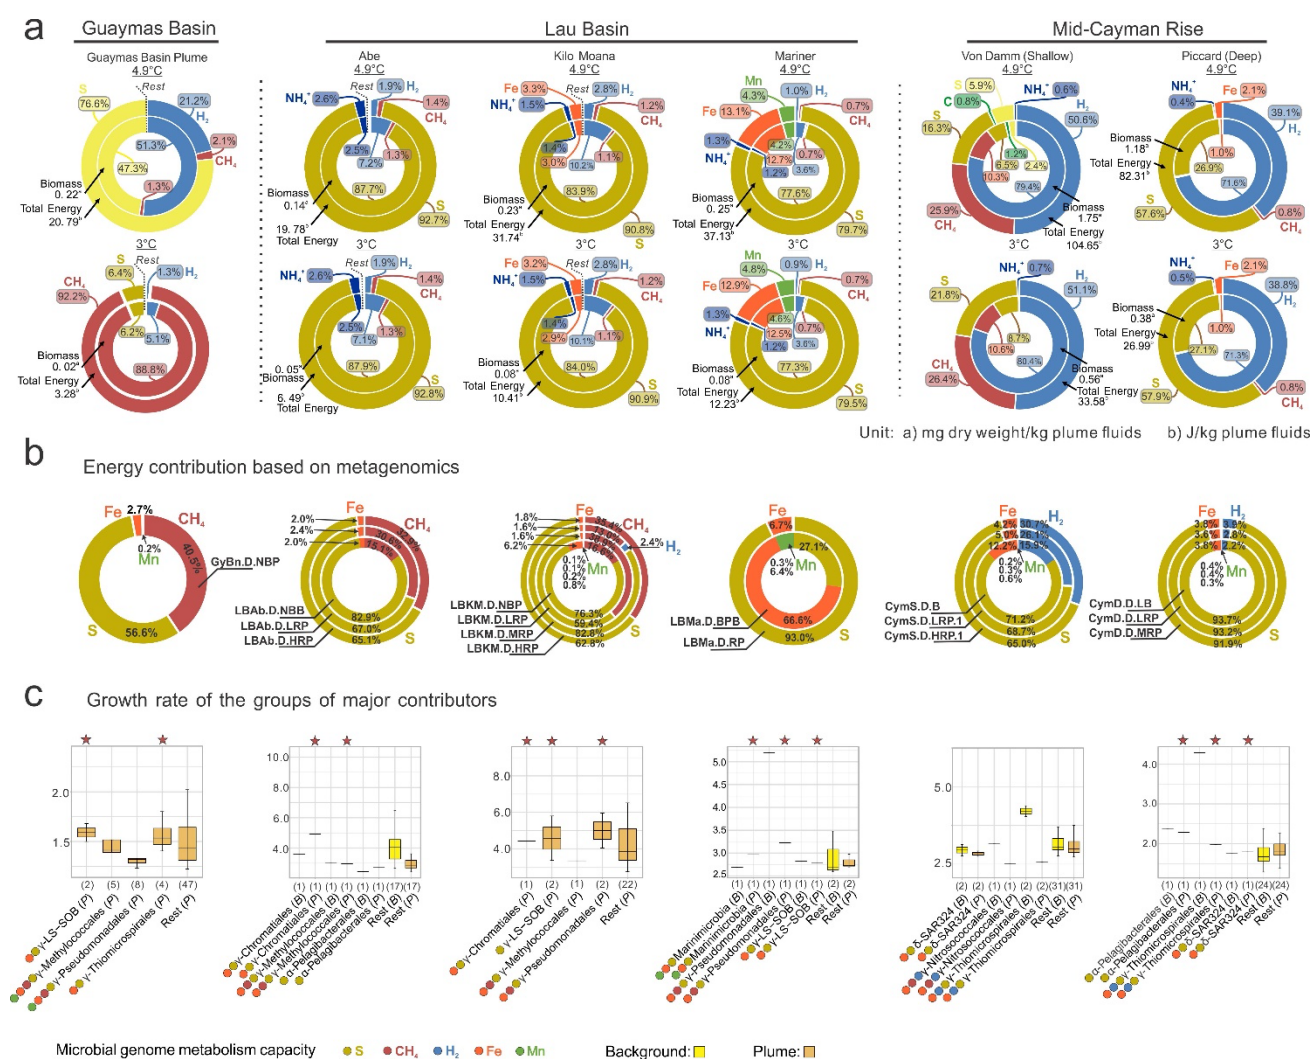

**Fig. 2 | Thermodynamic estimation of available free energies and biomass yields from electron donors, metagenomics-based contribution of electron donors to energy, and growth rates of major microbial contributors.** **a** Thermodynamic estimation diagram of available free energy and biomass. For each hydrothermal environment, the contribution fraction of each electron donor species was labeled accordingly in the rings. The total available free energies and biomass were labeled accordingly to individual plumes. Two temperatures (3°C and 4.9°C) were picked to represent *in situ* temperatures in the upper and lower plume. Light yellow represents aerobic sulfur oxidation, dark yellow represents anaerobic sulfur oxidation. **b** Metagenomics-based estimation of energy contribution. Energy contribution for each electron donor was calculated based on metagenomic abundance of each reaction of electron donors and free energy yield of each reaction. The contribution ratio of electron donor species was calculated for individual environments respectively. **c** Growth rate of major microbial contributors in each hydrothermal environment. The y-axis for each barplot indicates the replication rate. The microbial groups starting with “α-”, “γ-”, and “δ-” represent Alphaproteobacteria, Gammaproteobacteria, and Deltaproteobacteria, respectively. Plume microbial groups were colored by dark yellow, background microbial groups were colored by light yellow and they were also all labeled with “(P)” or “(B)”, respectively. Numbers in brackets indicate MAG numbers in each microbial group. Star-labeled plume microbial groups had higher growth rates than the ‘Rest’ plume microbial groups.

179

180

181 **Across- and within-site comparisons for plumes show consistent links between**  
 182 **geochemistry, function, and taxonomy**

183 MAGs reconstructed from Guaymas Basin, Mid-Cayman Rise, and Lau Basin hydrothermal vents and  
 184 corresponding omics-based profiling enabled taxonomic and functional comparisons among the three  
 185 sites (Fig. S4, S5, and Supplementary Data 3). Across-site analyses of functional traits in MAGs  
 186 indicate that different functions were significantly enriched in different plumes, e.g., arsenate reduction  
 187 and long-chain alkane (C<sub>6+</sub>) degradation in Lau Basin, CO and methanol oxidation in Mid-Cayman



188 Rise, and toluene and benzene degradation in Guaymas Basin (Fig. 1c, Fig. S7b). In parallel, the  
189 distribution and abundance of some microbial groups were also significantly enriched in the same  
190 samples accordingly (Fig. S7a) and underlay the functional differentiation, e.g., arsenate reduction in  
191 Lau Basin background deep-sea was attributed to members of Bacteroidetes and Thiomicrospirales  
192 while that same function in Lau Basin plumes was attributed to only Thiomicrospirales. CO oxidation  
193 in Mid-Cayman plumes was attributed to Chloroflexi, and toluene and benzene degradation in  
194 Guaymas Basin plume attributable to Methylococcales and Pseudomonadales (Supplementary Data 5).  
195 These observations are consistent with hydrothermal vent fluid geochemistry, e.g. Lau Basin  
196 hydrothermal vents have high arsenic end-member concentrations<sup>33</sup> (ranging from 2.1-11  $\mu\text{mol/kg}$ )  
197 and Guaymas Basin fluids contain aromatic hydrocarbons (primarily benzene and toluene)<sup>34</sup>.

198  
199 As for within-site comparisons, the data indicate that the top three contributing taxa for major functions  
200 (including eight categories, carbon fixation, denitrification, sulfur cycling, hydrogen oxidation,  
201 methane oxidation, aerobic oxidation, iron oxidation, and manganese oxidation) are largely shared  
202 between plume and background deep seawater in Mid-Cayman Rise and Lau Basin, indicating  
203 functional consistency which was linked to taxonomy (Supplementary Data 5). Nevertheless, taxa  
204 abundance differed between plume and background, as reflected by both DNA and cDNA datasets  
205 associated with important functions (Supplementary Data 5, 6). Based on the results from energy  
206 landscape and MAG-based comparisons, our results suggest the adaptation of the plume microbiome,  
207 and demonstrate the consistency of links between taxonomy, function, and geochemistry.

208

### 209 **Sulfur cycling drives metabolic interactions in hydrothermal plumes**

210 Building on our findings from both thermodynamic modeling and omics-based biogeochemical  
211 estimations which indicated the importance of sulfur-based metabolisms, we studied microbial  
212 metabolic interactions associated with sulfur cycling in all plumes. We recently developed a metric,  
213 metabolic weight score (MW-score)<sup>35</sup> to measure the contribution of metabolic/biogeochemical steps,  
214 and their metabolic connectivity in a microbial community. More frequently shared functions and their  
215 higher abundances in a microbial community lead to higher MW-scores<sup>35</sup>. Both metagenomics and  
216 metatranscriptomic data showed elemental sulfur oxidation to be the key reaction in the sulfur cycle  
217 (Fig. 3a). In each community, sulfur oxidation had the highest MW-score (Fig. 4b, Fig. S10). Major  
218 contributors (*dsrAB* and *sdo* containing MAGs) to sulfur oxidation varied in different hydrothermal  
219 vent sites (Fig. 3b), indicating core sulfur oxidizers can have distinct distributions locally. Metabolic  
220 overlaps existed as some sulfur oxidizers had additional metabolic potential associated with utilizing  
221 various small carbon substrates and hydrogen, reducing nitrate/nitrite, and oxidizing  
222 iron/manganese/arsenite<sup>36</sup> (Fig. 3c). Additionally, numerous connections of sulfur oxidation with other  
223 electron-transferring reactions were observed in the functional network (Fig. 4b, c, d, and Fig. S10).  
224 Previously, sulfur-oxidizing bacteria belonging to SUP05 (Thiomicrospirales in GTDB R83 or PS1 in  
225 GTDB R202) and SAR324 lineages were identified to have metabolic plasticity involving the ability  
226 to conduct hydrogen oxidation and nitrate reduction<sup>7, 37</sup> (in case of SUP05) and alkane/methane/carbon  
227 monoxide oxidation<sup>17, 38</sup> (in case of SAR324) in plume and deep-sea environments, suggesting that  
228 plume microorganisms are optimized to mediate energy transformations upon available electron  
229 donors and acceptors. Here, our study indicates sulfur oxidizers are the primary group associated with

230 energy scavenging from plume substrates. Sulfur oxidizers have metabolic plasticity to connect sulfur  
231 metabolism with other elemental transformations, are adapted to plume environments, and contribute  
232 significantly to biogeochemical cycles in the deep sea.

233

234 While sulfur oxidation connects other metabolic reactions in the overall functional network and has  
235 significant energy yields, its role on the overall network complexity remains elusive. Specifically, we  
236 investigated the impact of sulfur metabolism on overall plume microbial metabolism. To address this,  
237 we built networks based on reactions and the percent energy yields, and investigated reaction influence  
238 on network complexity<sup>39, 40, 41</sup> (Fig. 4a, Fig. S11). The network of reactions works as a whole  
239 mechanism where each reaction is one part<sup>40</sup> and high  $\Delta C$  reactions are key features of the networks.  
240 Most of these  $\Delta C$  (complexity change) values are positive except for two points (Fig. 4a, Fig. S11).  
241 This indicates that all but two of these reaction nodes drive the system away from randomness and  
242 significantly contribute to the complexity of the network as a whole<sup>40</sup>. Meanwhile, in general, it seems  
243 that most reactions that are closer to smaller  $\Delta C$  have higher percent energy yields associated with  
244 their reactions (Fig. 4a, Fig. S11). This phenomenon suggests that reaction nodes that result in higher  
245 changes of percent energy yields are not necessarily contributing to the reaction network's complexity  
246 the most. Overall, this suggests that while sulfur oxidation tends to have higher energy yields, other  
247 reactions are also important components in plumes, and together cohesively contribute to the energy  
248 landscape.

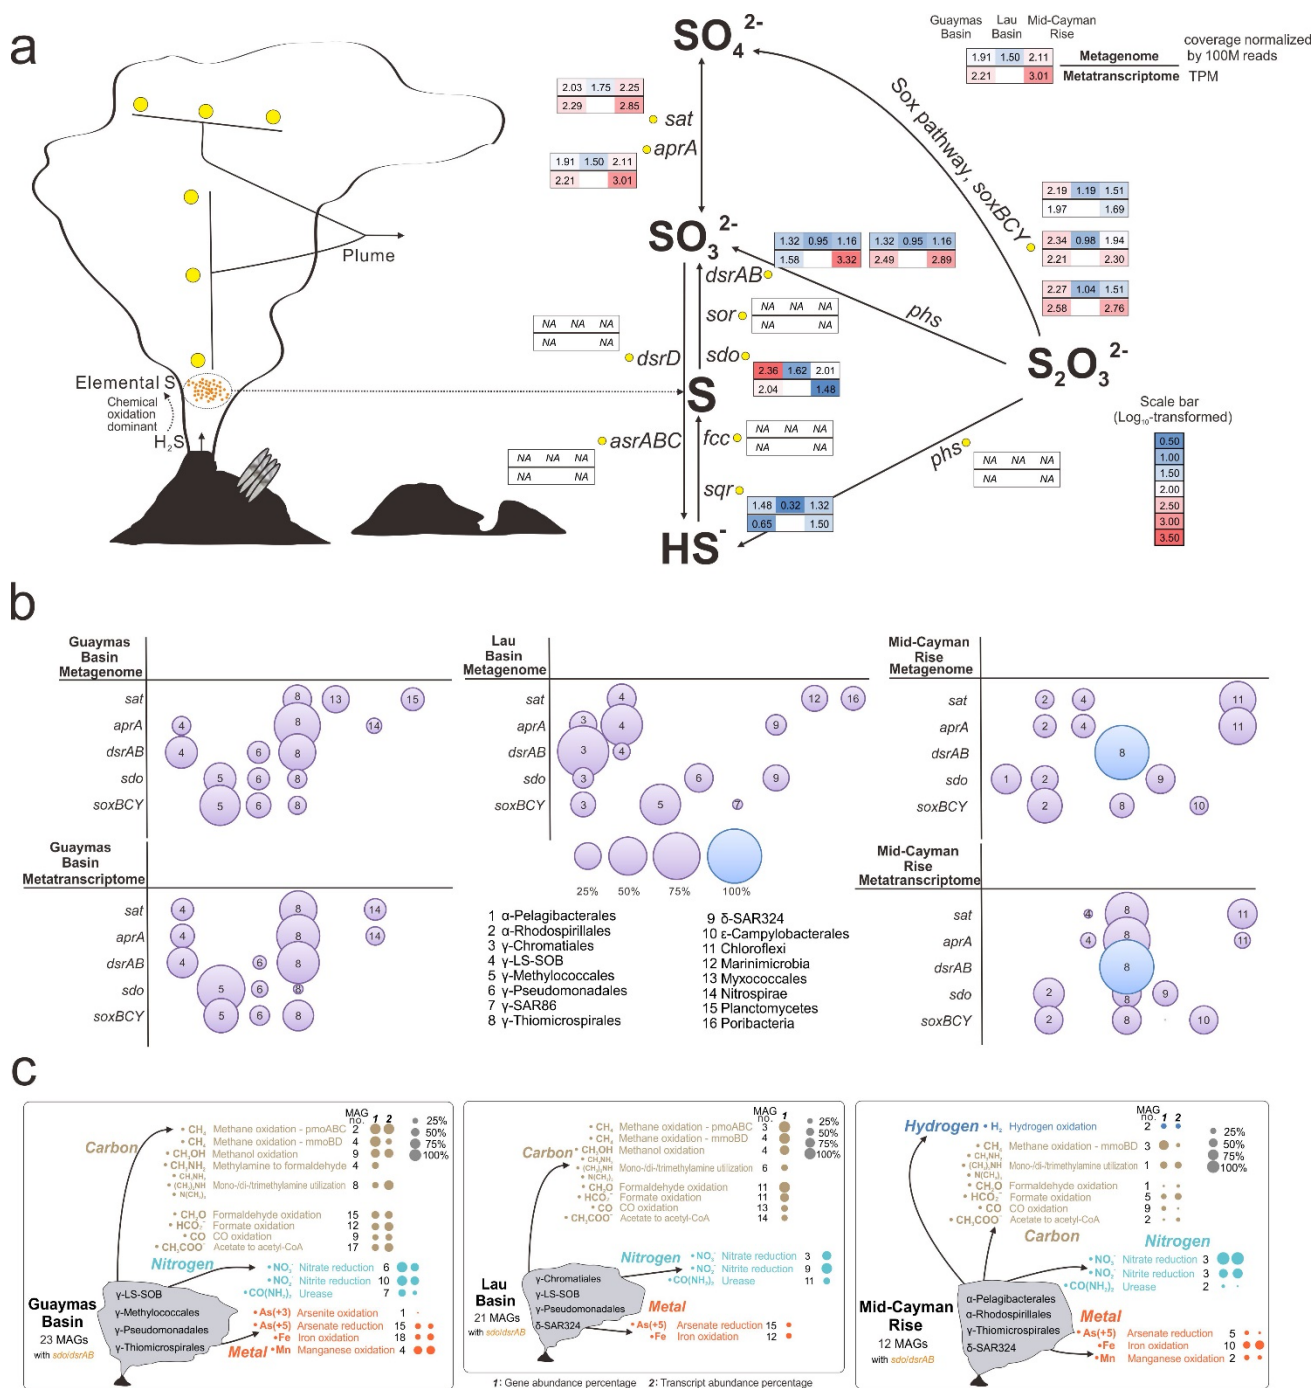

**Fig. 3 | Sulfur metabolism and metabolic plasticity of sulfur oxidizers. a** Details of sulfur metabolism pathways in the hydrothermal plume. The gene abundance (coverage normalized by 100M reads) and transcript expression level (TPM) for each step were calculated based on plume metagenomic and metatranscriptomic read mapping results. Log<sub>10</sub>-transformed values of gene abundance and transcript expression level were labeled accordingly in the diagram. **b** Major contributors to sulfur metabolizing genes. For each sulfur metabolizing gene, microbial groups that occupied > 10% of the total gene abundance (by metagenome) or transcript expression (by metatranscriptome) values were labeled in the diagram. For some genes with only three or less than three contributors, all contributors were labeled. **c** Metabolic plasticity of sulfur oxidizers. For each hydrothermal vent site, three parameters were given to show the metabolic plasticity of sulfur oxidizers in conducting each electron transferring reaction related to carbon, nitrogen, hydrogen, and metal biogeochemical cyclings: the number of sulfur-oxidizing gene containing MAGs, gene abundance percentage, and transcript abundance percentage.

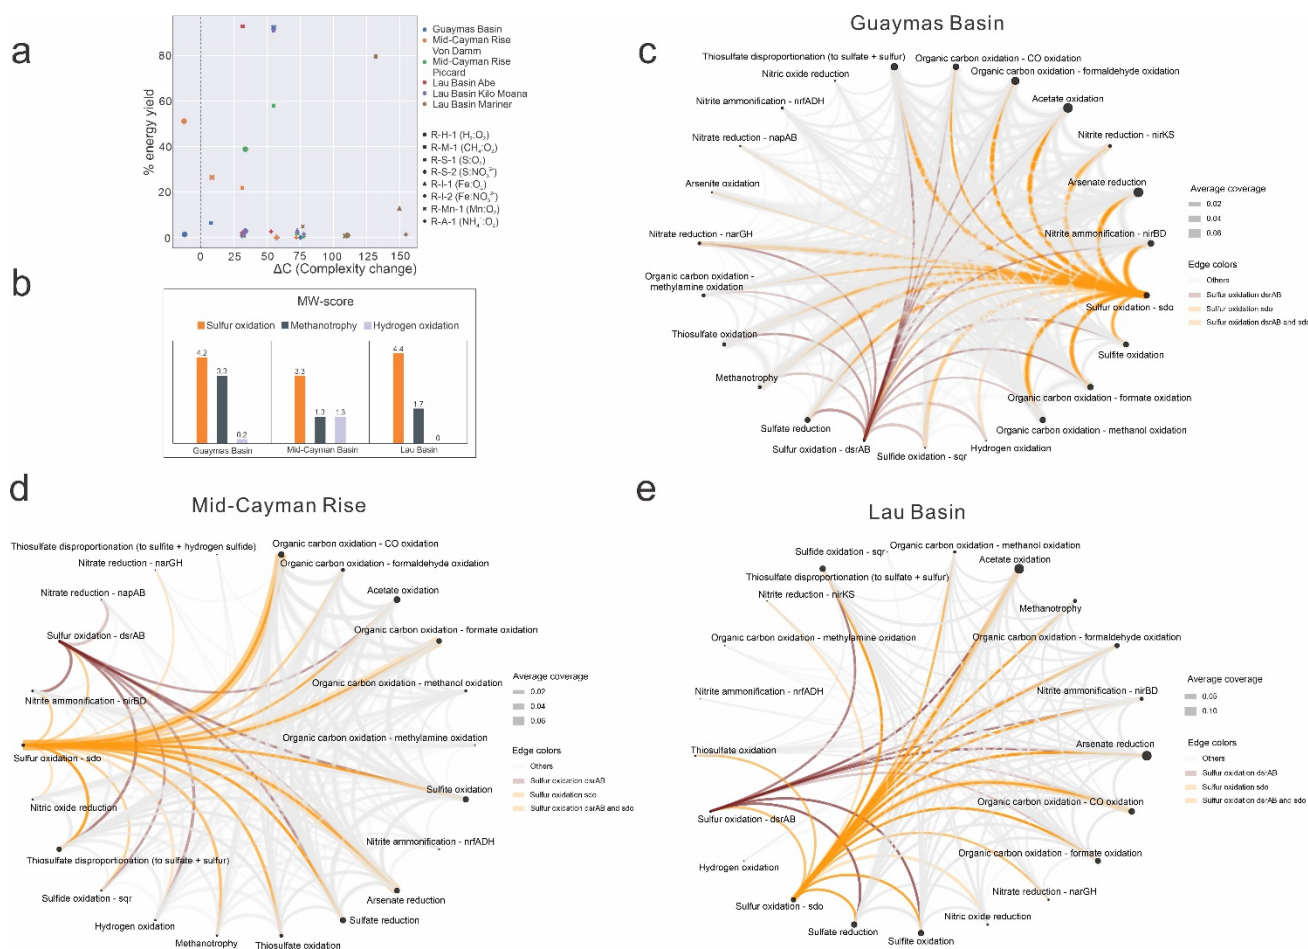

251  
252

**Fig. 4 | Network complexity, MW-scores (metabolic weight scores), and functional network diagrams of the three hydrothermal vent sites.** **a** Network complexity diagram representing each reaction's influence on the complexity of the network. In the figure, different colors represent different hydrothermal environments, different symbol shapes represent different reactions. The substrates (including electron donors and acceptors) were listed for each reaction in the legend. The x-axis is the change in complexity ( $\Delta C$ ) of the whole network for a node (a reaction here) and the y-axis is the percent energy yield of that reaction in the whole community. This network complexity diagram was based on thermodynamic estimation results at 3°C. **b** MW-scores of three major energy contributing reactions. **c** Functional network diagram of Guaymas Basin. **d** Functional network diagram of Mid-Cayman Rise. **e** Functional network diagram of Lau Basin. A group of metabolic cycling steps that are important in reflecting the plume substrate metabolisms were selected from METABOLIC-C regular MW-score results to make these functional network diagrams (**c**, **d**, **e**), respectively. In each functional network diagram, the size of a node is proportional to gene coverage with the metabolic/biogeochemical cycling step. The thickness of the edge represents the average gene coverage values of the two connected metabolic/biogeochemical cycling steps. Edges related to two reactions of sulfur oxidation were colored accordingly in each diagram.

253

## 254 **Low diversity, short migration history, and gene-specific sweeps in plume populations**

255 Metagenomes provide full repertoires of genomic variation and facilitate interpreting fine-scale  
 256 evolutionary mechanisms<sup>42, 43, 44</sup>. Here, we used *Tara* Ocean metagenomic datasets<sup>45</sup> from the  
 257 mesopelagic oceans to compare metagenomes from hydrothermal plume environments to the wider  
 258 pelagic oceans and study the population genetic diversity of each MAG. We discovered that a large  
 259 portion of MAGs exhibited a similar tendency of normalized single nucleotide variation (SNV) counts,  
 260 nonsynonymous/synonymous substitution ratio of SNV (N/S SNV), and genome-wide mean  $r^2$  (Fig.  
 261 [5a and Supplementary Data 11](#)). In hydrothermal plumes, their SNV count is lower than *Tara* Ocean  
 262 samples, N/S SNV ratio is higher than *Tara* Ocean samples, and mean  $r^2$  is higher than *Tara* Ocean  
 263 samples. This suggests that in the plume: (1) Less SNVs are present, and population diversity is lower;

264 (2) The population is younger with a short migration history. The higher N/S SNV ratio indicates that  
265 younger populations are less subjected to purifying (negative) selection to remove deleterious  
266 mutations; (3) The population is less subjected to recombination. The higher mean  $r^2$  reflects higher  
267 SNV linkage frequency at the genome-wide scale, indicating a lower recombination rate among  
268 population members.

269

270 Next, we investigated potential signals of genome/gene sweeps using fine-scale evolutionary  
271 parameters. Consensus base frequency (frequency of reads supporting the consensus base), N SNV,  
272 and S SNV all showed no significant differences between plumes and the pelagic ocean  
273 (Supplementary Data 11). This indicates that these populations are unlikely to have undergone  
274 selective genome sweeps and clonal expansion during migration. We calculated fixation index  $F_{ST}$ <sup>46</sup>  
275 based on gene allele frequencies between these two environments (Fig. 5b and Supplementary Data  
276 12) to investigate environmental selection. High  $F_{ST}$  genes are potential loci where selective pressures  
277 act on and indicate niche-specific adaptation. Further stringent criteria require the lower gene  
278 nucleotide diversity and higher N/S SNV ratio (Fig. 5b and Supplementary Data 12). Decreases of  
279 nucleotide diversity indicate gene-specific selective sweeps in the hydrothermal plume environment,  
280 and higher N to S SNV ratios suggest that these genes underwent a recent selection. Amongst 260  
281 identified high  $F_{ST}$  genes using our stringent criteria, many of them involved transporters, aerobic  
282 oxidation, and stress responses (Fig. 5b and Supplementary Data 12). Transporters were associated  
283 with diverse substrates, e.g., metals (Co, Fe, and Mg), amino acids,  $\text{Na}^+/\text{H}^+$ , anions  
284 (nitrate/sulfonate/bicarbonate), carbohydrates (ribose/xylose/arabinose/galactoside), and aliphatic  
285 polyamines (spermidine/putrescine); meanwhile, these transporters are associated with many  
286 transporter families (Supplementary Data 12), including ABC superfamily, tripartite ATP-independent  
287 periplasmic (TRAP) family, tripartite tricarboxylate transporter (TTT) family, etc.

288

289 Given the observed importance of sulfur metabolism in plumes, we focused on the 238 identified sulfur  
290 metabolism genes. 23 of these genes had signals of being fixed after migration with  $F_{ST}$  values higher  
291 than the genome average (Fig. 5c and Supplementary Data 13). These genes were associated with  
292 sulfur oxidation, thiosulfate oxidation, and sulfite oxidation/sulfate reduction (*sat*, *aprA*, *sdo*, oxidative  
293 *dsrAB*, and *soxBC*) (Supplementary Data 13). This provides evidence that though not reaching the  
294 level of gene-specific selection sweeps, these genes were still being selected across the genome.  
295 Overall, this suggests a genetic adaptation to a sulfur-dominated environment after migration. An  
296 underlying evolutionary paradigm can be outlined from our population-level microdiversity analyses  
297 (Fig. 5c). As microbes enter the hydrothermal plume, some groups are selected for, and thrive due to  
298 substrates provided locally. This stimulates the growth of certain populations; meanwhile, constraints  
299 in the plume environment also induce selection effects and reduce the diversity of the population  
300 majority. Higher N/S SNV indicates they are young populations and are growing in the plume,  
301 consistent with the higher growth rates of major energy contributors. Gene-specific sweeps indicate  
302 local adaptation to the plume environment, and partially change population genetic structures after  
303 migration. Plume microbial populations are still in the early stage of evolution; as time goes on,  
304 mutations will progressively accumulate and deleterious SNVs will be gradually purged.

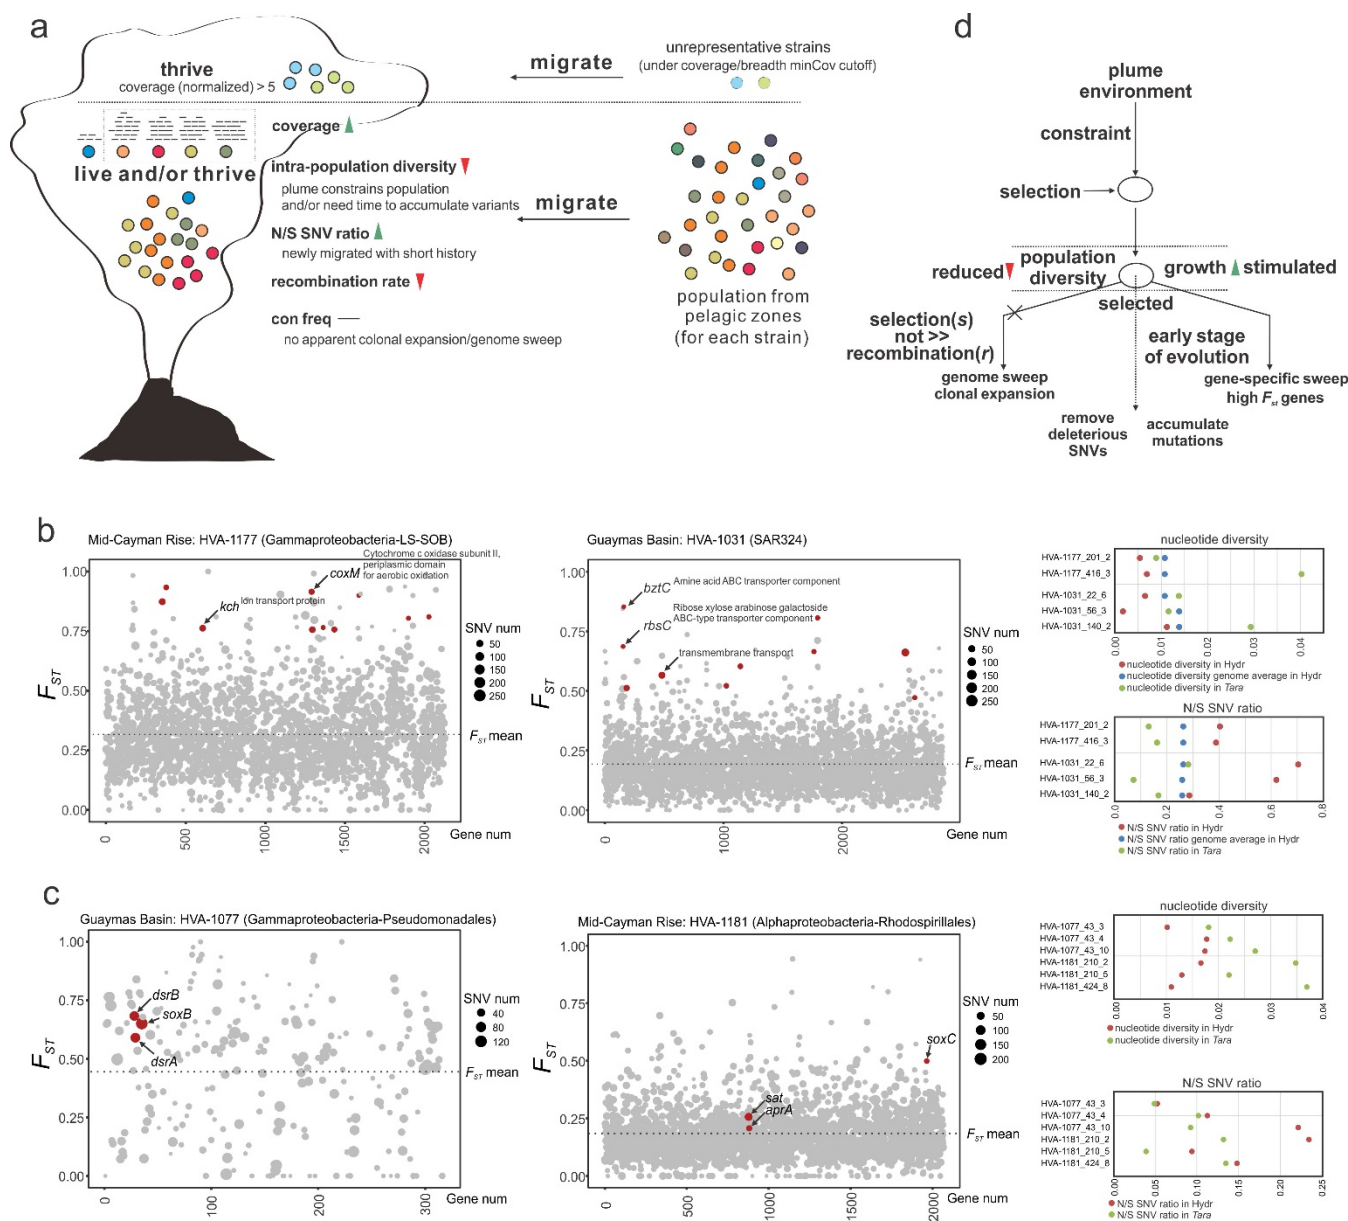

305

**Fig. 5 | Evolutionary mechanism of plume microbial populations during migration.** **a** Schematic diagram showing the changing trend of microdiversity parameters during migration. Individual solid dots with various colors represent microbial populations. Two scenarios were depicted in this panel: unrepresentative strains and strains that have detectable read mapping results in both environments. **b** Two representative charts showing  $F_{ST}$  distribution in MAGs that contain high  $F_{ST}$  genes. In each chart, the x-axis represents gene numbers (only genes with detectable  $F_{ST}$ ; negative values were removed). Dot sizes were proportional to SNV numbers in individual genes, and  $F_{ST}$  genome-wide mean was depicted in each chart with dash lines. Red-colored dots represent high  $F_{ST}$  genes that also passed the requirements of  $F_{ST}$ , nucleotide diversity, N/S SNV ratios, and coverages (see methods). The nucleotide diversity and N/S SNV ratio distribution for high  $F_{ST}$  genes and genome-wide mean of all genes in different environments were depicted in the chart on the right side. Details of high  $F_{ST}$  genes and related parameters in individual genomes (all hits, also including these two representative genomes) were listed in [Supplementary Data 12](#). **c** Two representative charts showing  $F_{ST}$  distribution in MAGs that contain sulfur metabolizing genes with signals of being fixed. In each chart, the x-axis represents gene numbers (only genes with detectable  $F_{ST}$ ; negative values were removed). Dot sizes were proportional to SNV numbers in individual genes, and  $F_{ST}$  genome-wide mean was depicted in each chart with dash lines. Red-colored dots represent sulfur metabolizing genes that passed the requirements of  $F_{ST}$ , nucleotide diversity, N/S SNV ratios, and coverages (see methods). The nucleotide diversity and N/S SNV ratio distribution for sulfur metabolizing genes in different environments were depicted in the chart on the right side. Details of sulfur metabolizing genes with signals of being fixed and related parameters in individual genomes (all hits, also including these two representative genomes) were listed in [Supplementary Data 13](#). **d** Frame diagram showing the underlying evolutionary processes during migration. Circles represent microbial populations. Dash line arrows indicate the direction of the next evolutionary step.

306

## 307 Discussion

308 In this study, we observed that distinctive plume geochemistry influences the energy landscape across  
309 three different hydrothermal vent sites<sup>4,29</sup>. Sulfur oxidation is the major energy-yielding reaction, while  
310 different sites are also represented by different energy landscapes influenced by differing vent  
311 geochemistry. For instance, other important energy sources like methane and hydrogen also have  
312 important roles in the energy landscape of hydrothermal plumes. The existence of a core plume  
313 microbiome indicates that a general biogeochemical feature – energy and substrate supply – within  
314 hydrothermal plumes supports the growth of these globally dispersed cosmopolitan microorganisms.  
315 As a consequence, the core plume microbiome is likely a result of the sulfur oxidation-based energy  
316 landscapes shared among many hydrothermal plumes around the globe. The increased taxa abundance  
317 and higher growth rates of major energy contributing taxa supports the interpretation that microbiomes  
318 act in response to geochemically-influenced energy landscapes with some taxa fueled by plume  
319 substrates. These analyses support the theory of an ocean seed bank origin of the hydrothermal plume  
320 microbiome<sup>47</sup>. Plume geochemistry defines the energy availability, serving as a key control on the  
321 microbiome distribution and abundance<sup>2, 9</sup>. The consistent taxonomy-function-geochemistry links  
322 demonstrated by us suggest that omics-based profiling that reflects the full genetic repertoire of plume  
323 microorganisms can be a powerful tool to unravel the relationship between environments and  
324 microbiomes.

325  
326 Characterization of sulfur metabolism in plumes reveals that though all plumes have sulfur oxidation  
327 as the reaction with the highest MW-score, and sulfur-oxidizing genes were highly expressed, the  
328 major populations contributing to these processes (*dsrAB* and *sdo* containing MAGs) vary in different  
329 hydrothermal vent sites. This indicates the variable composition of core sulfur oxidizers in individual  
330 environments which suggests the endemicity of microbial community structure. Core sulfur oxidizers  
331 can be derived from the pelagic ocean through stochastic processes that can be influenced by dormancy  
332 capacity to provide resilient seed microbes, ocean currents to overcome dispersal limitations, and  
333 adaptive strategies to nutrient and temperature fluctuations<sup>2</sup>. Core members of the plume microbiome  
334 derived in this manner likely thrive under favorable geochemical conditions<sup>48</sup>. For example,  
335 Pseudomonadales, Thiomicrospirales, and SAR324 are members of the core plume microbiome, but  
336 are also known to be abundant cosmopolitan bacteria in the pelagic oceans. These microorganisms can  
337 be distributed as seed banks in the global oceans, triggered by plume sulfur substrates, and  
338 subsequently become active sulfur oxidizers in hydrothermal plumes<sup>9, 48</sup>. Sulfur oxidizers within the  
339 community have metabolic plasticity to connect other energy transformation activities, e.g., small  
340 carbon substrate utilization, nitrate/nitrite reduction, and iron/manganese/arsenite oxidation, etc. This  
341 indicates that sulfur and other energy sources can be simultaneously utilized for energy conservation  
342 by sulfur oxidizers even in various plume environments with different energy landscapes. At the same  
343 time, as described in the network complexity analysis, though sulfur oxidation dominates in energy  
344 generation, other reactions are also important components in the metabolic network connected to sulfur  
345 oxidation, and cohesively contribute to the energy landscape.

346  
347 Finally, the microdiversity patterns observed in plume microorganisms depict a scheme of populations  
348 selected by environmental constraints. Low population diversity and high N/S SNV ratio indicate that

349 microbes are selected by plume conditions and actively grow after a short migration history. Evidence  
350 shows that gene-specific sweeps within certain plume populations are related to nutrient uptake,  
351 aerobic oxidation, and stress responses, and some sulfur metabolizing genes are also selected during  
352 the environmental change. These traits help microbial cells to be more adaptable and resilient in sulfur  
353 oxidation-dominated hydrothermal plume conditions. Collectively, the plume microbiome has a  
354 distinctive composition, function, and genetic structure focused on allowing organisms to better adapt  
355 to hydrothermal plume conditions. Population alteration in plumes compared to the background deep  
356 sea involves both reshaping community-level structure and fine-scale strain-level genetic adjustments  
357 that includes advantageous metabolisms being fixed. These nuanced microdiversity changes can lead  
358 to fundamental changes in population fitness towards niche adaptation. Overall, the plume microbial  
359 community is associated with energy conservation, metabolic distribution, and cell stress response  
360 which likely facilitates more efficient adaptation of the plume microbiome in mediating  
361 biogeochemical cycles. The connected relationship between microbiome and biogeochemistry we  
362 demonstrate reflects the overall ecological and evolutionary basis of microbial strategies for thriving  
363 in geochemically-rich energy landscapes.  
364

### 365 **Data availability**

366 The MAG genomic sequences are deposited into the NCBI Genome database under the BioProject ID  
367 of PRJNA488180. The genome annotation results from this study are publicly available at  
368 <https://doi.org/10.5281/zenodo.5034800> (all plume MAG annotations are deposited to this location).  
369

### 370 **Code availability**

371 The Perl and R codes for parsing, calculating, and visualizing in this study are publicly available at  
372 [https://github.com/AnantharamanLab/Hydrothermal\\_plume\\_omics\\_Zhou\\_et\\_al.\\_2021](https://github.com/AnantharamanLab/Hydrothermal_plume_omics_Zhou_et_al._2021).  
373

### 374 **Acknowledgments**

375 We thank all the members in the cruise of R/V New Horizon in Guaymas Basin, Gulf of California  
376 (July 2004), R/V Atlantis and R/V Falkor in Mid-Cayman Rise, Caribbean Sea (Jan 2012 and June  
377 2013), R/V Thomas G Thompson in Eastern Lau Spreading Center (ELSC), Lau Basin, western Pacific  
378 Ocean (May-July 2009), R/V MGS Sagar in Central Indian Ridge and Southwest Indian Ridge (Jan-  
379 Mar 2017), and R/V Thomas G Thompson in Axial Seamount (Aug 2015) in assisting sampling and  
380 physicochemical data measuring and processing. This research was supported by the National Science  
381 Foundation under grant number OCE 2049478 to K.A and OCE 1851208 to J.A.B and the Gordon and  
382 Betty Moore Foundation under grant number GBMF3297 to J.A.H.

### 383 **Author contributions**

384 Z.Z. and K.A. conceived the project. K.A. designed the framework of this project. Z.Z. led the research  
385 and conducted the data analysis. Z.Z. and K.A. wrote the manuscript. J.A.B. and G.J.D. sampled in the  
386 cruises and J.A.B. contributed to the thermodynamic modeling. K.K., P.Q.T, and A.M.A. helped on  
387 data analysis and/or visualization. All authors (Z.Z., P.Q.T., A.M.A., K.K., J.A.B., R.K.S., K.P.K.,



388 P.J.K., C.S.F., C.S.S., J.A.H., M.L., G.J.D., and K.A.) reviewed the results, revised, and approved the  
389 manuscript.

## 390 **Competing interests**

391 The authors declare that they have no competing interests.

## 392 **Additional information**

393 Supplementary Information is available for this paper on XXX website.

394

395 **Reprints and permissions information** is available at [www.nature.com/reprints](http://www.nature.com/reprints)

396 **Correspondence and requests for materials** should be addressed to K.A.

397

## 398 **Methods**

### 399 **Sample information and omics sequencing**

400 Hydrothermal plume and surrounding background samples were collected from the corresponding  
401 cruises: R/V New Horizon sampling in Guaymas Basin, Gulf of California (July 2004), R/V Atlantis  
402 and R/V Falkor sampling in Mid-Cayman Rise, Caribbean Sea (Jan 2012 and June 2013), two  
403 consecutive cruises on the R/V Thomas G Thompson sampling in Eastern Lau Spreading Center  
404 (ELSC), Lau Basin, western Pacific Ocean (May-July 2009), R/V MGS Sagar sampling in Central  
405 Indian Ridge and Southwest Indian Ridge (Jan-Mar 2017), and R/V Thomas G Thompson sampling in  
406 Axial Seamount, Juan de Fuca Ridge, northeastern Pacific Ocean (Aug 2015). In brief, Guaymas Basin  
407 plume and background samples were collected by 10 L CTD-Rosette bottles and N<sub>2</sub>-pressure filtered  
408 on board for microbial specimen collection by 0.2 µm pore size, 142 mm polycarbonate membranes<sup>11</sup>.  
409 The samples were preserved immediately in RNAlater. Mid-Cayman hydrothermal plume and  
410 surrounding background samples were collected by Suspended Particulate Rosette (SUPR) filtration  
411 device<sup>49</sup> mounted to the remotely operated vehicle Jason II. SUPR collected water with the amount of  
412 10-60 L from different sampling locations, and these samples were *in-situ* filtered for microbial  
413 specimens by 0.2 µm pore size SUPOR polyethersulfone membranes and preserved in RNAlater  
414 flooded conical vials and frozen at -80°C. For Lau Basin samples, SUPR-collected samples were *in-*  
415 *situ* filtered by SUPOR polyethersulfone membranes with 0.8 µm and 0.2/0.8 µm pore size for  
416 geochemical analysis and microbial specimen collection, respectively<sup>26</sup>. Samples were preserved in  
417 RNAlater flooded conical vials and frozen at -80°C. Central Indian Ridge and Southwest Indian Ridge  
418 samples were collected by 10 L CTD-Rosette bottles and filtered by 0.2 µm pore size, 47 mm SUPOR  
419 polyethersulfone membranes, and preserved in RNAlater flooded conical vials and frozen at -80°C.  
420 For Axial Seamount samples, both plume and background samples were collected by a Seabird  
421 SBE911 CTD and 10L Niskin bottles<sup>50</sup>. Samples of 3 L were then transferred into cubitainers, filtered  
422 through 0.22 µm Sterivex filters, and preserved for downstream analysis<sup>50</sup>.

423

424 Details for sample collection, preservation, geochemical analysis, and  
425 metagenomic/metatranscriptomic sequencing refer to the previous publications<sup>22,50,51</sup>. Detailed cruises  
426 and sampling information refer to [Supplementary Data 1](#). The geological map and schematic diagram  
427 represent the details of sampling locations ([Fig. 1a](#), [Fig. S1](#)). The metagenomic DNA and

428 metatranscriptomic cDNA were extracted and synthesized from corresponding samples and processed  
429 for Illumina HiSeq 2000/2500 sequencing as described previously<sup>11, 14, 18, 25, 50</sup>. The distribution of  
430 acquired metagenomes (DNAs, labeled as “D”) and metatranscriptomes (cDNA, labeled as “C”) was  
431 represented in [Fig. S1b](#) (only for samples with detailed location and physicochemical characterization;  
432 distribution of other samples refers to [Supplementary Data 1](#)). The raw reads (both DNA/cDNA reads)  
433 were dereplicated by SeqTools v4.28 (<https://www.sanger.ac.uk/tool/seqtools/>) and processed by  
434 Sickle v1.33 (<https://github.com/najoshi/sickle>) to trim reads of low quality with default settings.  
435 Command “reformat.sh” in BBTools (last modified on Feb 11, 2019;  
436 <https://www.sourceforge.net/projects/bbmap/>) was used to calculate fastq sequence and nucleotide  
437 numbers.

438

### 439 **Core hydrothermal plume microbiome analysis**

440 In total, 51 hydrothermal plume and background 16S rRNA gene datasets were used for analyzing the  
441 microbiome of hydrothermal plume, within which 24 datasets were obtained in this study, containing  
442 datasets from samples of Mid-Cayman Rise, Guaymas Basin, Lau Basin, Central and Southwestern  
443 Indian Ridge, and Axial Seamount plume ([Supplementary Data 2](#)). For hydrothermal plume and  
444 background samples with only metagenome datasets, 16S rRNA gene sequences were parsed out from  
445 metagenomes and these sequences were weighted according to their coverages. Simulated 16S rRNA  
446 gene datasets were used in subsequent analysis. The original datasets of paired-end reads were merged  
447 into combined 16S tags by FLASH v1.2.11<sup>52</sup> with default settings. The bioinformatic analyses,  
448 including pre-analysis quality control, 16S chimera checking, open-reference OTU picking, taxonomy  
449 assigning, OTU table file ‘biom’ generating and rarefying, OTU representative sequences filtering and  
450 aligning, alignment filtering, and phylogenetic tree reconstructing, were performed according to the  
451 instructions of QIIME v1.9.1<sup>53</sup>, respectively. The 16S rRNA reference database was based on  
452 “SILVA\_132\_QIIME\_release”<sup>54</sup>. The resulted ‘biom’ (OTU table file), ‘tre’ (phylogenetic tree), and  
453 “map” (sample characterization map) files were imported into R (using R package ‘*phyloseq*’) for  
454 downstream analysis and visualization. Taxa summary and principal coordinates analysis (PCoA) were  
455 conducted accordingly to delineate the community structure and biogeographic pattern of  
456 hydrothermal plume and background seawater microbiome. Genus-level taxa summary table was used  
457 to find core hydrothermal plume microbiome from 37 hydrothermal plume datasets by filtering genera  
458 that exist in > 67% plume datasets and have > 1% relative abundance on average. Core plume  
459 microbiome metabolic profiles were conducted by choosing MAGs (see the following sections of  
460 obtaining these MAGs) from this study that contain 16S rRNA genes affiliated to the core plume  
461 microbial genera. Metabolic profiling for these MAGs was based on the result from “MAGs genomic  
462 property and annotation”.

463

### 464 **Assembling and metagenomic binning**

465 QC-processed reads were assembled *de novo* by MEGAHIT v1.1.2<sup>55</sup> with settings as “--k-min 45 --k-  
466 max 95 --k-step 10”. Hydrothermal plume and background metagenomes from the same hydrothermal  
467 site were assembled together. QC-processed reads were re-mapped to assemblies by Bowtie 2 v2.2.8<sup>56</sup>  
468 with default settings. For each hydrothermal site, hydrothermal plume and background reads were  
469 mapped to corresponding assemblies separately; bam files by plume and background samples for

470 individual assemblies were used for downstream binning, Subsequently, the assemblies were subjected  
471 to a MetaBAT v0.32.4<sup>57</sup> based binning with 12 combinations of parameters. Afterward, DAS Tool  
472 v1.0<sup>58</sup> was applied to screen MetaBAT MAGs, resulting in high quality and completeness MAGs. This  
473 MetaBAT/DAS Tool method enables a comprehensive “slice-layer profiling” for searching potential  
474 MAGs with a better outcome (in-house tested). CheckM v1.0.7<sup>59</sup> was used to assess MAG quality and  
475 phylogeny. Outlier scaffolds with abnormal coverage, tetranucleotide signals, and GC pattern within  
476 potential high contamination MAGs (by CheckM) and erroneous SSU sequences within MAGs were  
477 screened out and decontaminated by RefineM v0.0.20<sup>60</sup> with default settings. Afterwards, further  
478 MAG refinement for decontaminating certain MAGs was manually inspected based on VizBin<sup>61</sup>.  
479 MAGs are picked using a threshold of < 10% contamination (namely genome redundancy) and > 50%  
480 completeness.

481

### 482 **MAG genomic property and annotation**

483 Genome phylogeny was determined by RefineM and GTDB-Tk v 0.2.1<sup>62</sup> (GTDB database, release 83).  
484 Additionally, phylogenies of those genomes that could not be assigned to a meaningful microbial group  
485 were inferred from ribosomal protein (RP) trees using the phylogenetic reconstruction method  
486 described below. Genomic properties, including genome coverage, genome and 16S rRNA taxonomy,  
487 tRNAs, genome completeness, and scaffold parameters, were parsed from results that were calculated  
488 by CheckM and tRNAscan-SE 2.0<sup>63</sup>. Relative genome coverages were normalized by setting each  
489 metagenomic dataset size as 100M paired-end reads. MAG ORFs were parsed out by the Prokka  
490 annotation pipeline v1.12<sup>64</sup> with default settings. For ORF annotation, GhostKOALA v2.0<sup>27</sup>, KAAS  
491 v2.1<sup>26</sup>, and eggNOG-mapper v4.5.1<sup>28</sup> were applied to thoroughly annotate ORFs to KOs. For eggNOG-  
492 mapper annotation, we used its first KO hit as annotation result; if there was only COG annotation, we  
493 translated it into KO using ‘ko2cog.xl’ provided by KEGG database. When combining three software  
494 annotations, we use resulted KO from the first software as the final annotation; if there is no annotation  
495 from the first software, then we will move to the next software accordingly. Annotation by NCBI nr  
496 database (Mar 6, 2017 updated) was conducted with default settings and for each annotation the first  
497 meaningful hit (hit not assigned as ‘hypothetical protein’) was extracted. Genomic-specific metabolic  
498 traits were searched against TIGRFam, Pfam, Kofam, and custom HMM profiles using hmmscan<sup>65</sup> and  
499 custom protein database using DIAMOND BLASTP<sup>66</sup>. For searching against custom HMM databases,  
500 noise cutoff values are determined according to previous settings<sup>12</sup>, respectively. For DIAMOND  
501 BLASTP searching, a stringent criterion as “-e 1e-20 --query-cover 65 --id 65” was applied.  
502 Carbohydrate active enzymes (CAZymes) were searched against dbCAN2 with default settings<sup>67</sup>;  
503 Peptidases were searched against MEROPS ‘pepunit’ database with stringent DIAMOND BLASTP  
504 settings as “-e 1e-10 --subject-cover 80 --id 50”<sup>68</sup>.

505

### 506 **Phylogenetic tree reconstruction**

507 The syntenic block of universal 16 ribosomal proteins (RPs) (L2-L6, L14-L16, L18, L22, L24, S3, S8,  
508 S10, S17, and S19) were used for inferring RP phylogenetic tree, after hmmscan-based<sup>65</sup> searching for  
509 RPs from all MAGs. The individual RP was pre-aligned with local custom RP database by MAFFT  
510 v7.123b<sup>69</sup> and curated in Geneious Prime v2019.0.4<sup>70</sup> by manually masking out begin and end regions  
511 with lots of gaps. Out of 206 MAGs, 177 containing > 4 RPs were used; the concatenated and curated

512 16RP-alignment (7741 aligned columns) was used for phylogenetic inference by IQTREE-based  
513 maximum likelihood method (IQ-TREE multicore v1.6.3<sup>71</sup>) with settings of “-m MFP -bb 1000 -redo  
514 -mset WAG,LG,JTT,Dayhoff -mrate E,I,G,I+G -mfreq FU -wbtl”. The resulted phylogenetic tree was  
515 rooted by archaea lineages and visualized by iTOL<sup>72</sup>. Functional traits were added accordingly to each  
516 MAG on the tree. Bacterial and archaeal SSU sequences (> 300 bp and the longest from individual  
517 MAG) parsed out by local pipeline (use CheckM ssuFinder<sup>59</sup> to pick and RefineM to filter erroneous  
518 hits) were aligned in SINA aligner<sup>73</sup> with default settings. The 16S sequence taxonomy was checked  
519 by BLASTn searching against SILVA\_128\_SSUParc\_tax\_silva database<sup>54</sup> and 16S sequences with  
520 resulted taxonomy different from their MAG phylogeny (at the phylum level) were filtered due to the  
521 high possibility of contamination. IQTREE-based<sup>71</sup> phylogenetic inference was conducted with  
522 settings of “-st DNA -m MFP -bb 1000 -alrt 1000”. The 16S rRNA gene tree based on the alignment  
523 of 85 sequences with 50000 columns was rooted by archaea lineages, visualized by iTOL<sup>72</sup>, and  
524 manually curated.

525

### 526 **Metagenomic and metatranscriptomic mapping**

527 QC-passed metagenomic reads were mapped to MAGs separately (metagenomic datasets from  
528 Guaymas Basin, Mid-Cayman Rise, and Lau Basin sites were mapped individually to the  
529 corresponding MAGs) using Bowtie 2 v2.2.8 with default settings<sup>56</sup>. MetaBAT integrated  
530 “jgi\_summarize\_bam\_contig\_depths” script and homemade Perl scripts were used to calculate MAG  
531 coverage (normalized coverage with each metagenomic dataset size set as 100M paired-end reads).  
532 QC-passed metatranscriptomic reads (use the same QC-process as described above with an additional  
533 SortMeRNA v2.1<sup>74</sup> rRNA filtering step) were mapped to MAGs separately, with TPM (Transcripts Per  
534 Kilobase Million) calculated for individual genes within each genome.

535

### 536 **Statistical comparison on MAG and functional trait abundance**

537 Metagenome/metatranscriptome-based MAG mapping results and functional annotations for all the  
538 MAGs were summarized individually. Afterwards, significance tests on the differentiation pattern of  
539 MAG (also MAG taxonomic group) and functional trait abundances across all the  
540 metagenomic/metatranscriptomic samples were calculated by R package DESeq2<sup>75</sup>. Log2 Fold  
541 Change value with adjusted *P*-value (by nbinomWaldTest) < 0.05 was considered as significant.  
542 Relative abundances of MAG (also MAG taxonomic group) and functional traits were visualized by  
543 R (using R package ‘*heatmap*’) with the relative abundance at row normalized by removing the mean  
544 (centering) and dividing by the standard deviation (scaling). Sunburst figures were generated to depict  
545 the relative abundance of MAGs based on metagenomic/metatranscriptomic mapping results, with the  
546 significant Log2 Fold Change values labeled to individual MAGs that have differential abundances  
547 between different hydrothermal ecological niches, e.g., plume and background.

548

549 To find taxa in microbial community that are responsible for enriched functions (functions that are  
550 significantly enriched in each environment), major functions (including functions that are in the  
551 categories of carbon fixation, denitrification, sulfur cycling, hydrogen oxidation, methane oxidation,  
552 aerobic oxidation, iron oxidation, and manganese oxidation), and specific functions, custom Perl  
553 scripts were written to get the corresponding microbial community contribution information (scripts

554 deposited in [https://github.com/AnantharamanLab/Hydrothermal\\_plume\\_omics\\_Zhou\\_et\\_al\\_2021](https://github.com/AnantharamanLab/Hydrothermal_plume_omics_Zhou_et_al_2021)).  
555 Functional trait results of all MAGs, MAG coverage within the community, and targeted function list  
556 were used as inputs to conduct the calculation. For environments with metatranscriptomic reads, we  
557 also used active MAG coverage (calculated by metatranscriptomic reads mapping result) as the input  
558 to calculate microbial community contribution information based on metatranscriptomes.

559

### 560 **Bioenergetic and thermodynamic modeling**

561 Equilibrium thermodynamic reaction path modeling was used to predict chemical concentrations and  
562 activity coefficients resulting from the mixing of seawater with end-member vent fluids  
563 (Supplementary Table 2). Our thermodynamic modeling builds on the specific plume model  
564 implementation described in Breier et al<sup>76</sup>. The estimated temperature of bottom seawater is according  
565 to the previous report<sup>10</sup>. The original chemical data is derived from Reeves et al<sup>77</sup> and Anantharaman  
566 et al<sup>10</sup>. For each hydrothermal vent system, we choose at least one representative end-member fluid  
567 sample(s), respectively (1 for Guaymas Basin, 2 for Mid-Cayman Rise, and 3 for Lau Basin)  
568 (Supplementary Table 2).

569

570 Bioenergetic and thermodynamic modeling procedures were conducted as described in Anantharaman  
571 et al<sup>7</sup> and Li et al<sup>18</sup> (More details refer to Supplementary Information and Tables). Reaction path  
572 modeling was performed with REACT, part of the Geochemist's Workbench package<sup>78</sup>. Conductive  
573 cooling was neglected and mixture temperatures were a strict function of conservative end-member  
574 mixing. Precipitated minerals were allowed to dissolve and their constituents to re-precipitate based  
575 on thermodynamic equilibrium constraints. Thermodynamic data were predicted by SUPCRT95<sup>79</sup> for  
576 the temperature range of 2°C to end-member vent fluid temperature and a pressure of 500 bar. The  
577 estimated biomasses and free energies of individual environments were calculated and their relative  
578 abundance change along the temperature range (2 - 121°C) was visualized by R. Two temperatures (3  
579 and 4.9°C) were picked to conduct the biomass and free energy estimation for representing typical  
580 plume temperatures in nature.

581

### 582 **Energy contribution and MAG growth rate calculation**

583 Based on metabolic prediction of each MAG and MAG gene coverage and expression level within  
584 each environment, energy contribution for each electron donor was calculated based on gene  
585 coverage/expression level and free energy of each catabolic reaction. The contribution ratio of electron  
586 donor species was calculated for individual samples respectively. We also included influence of the  
587 presence of electron acceptors to energy contribution calculation. To simplify the hydrothermal  
588 condition, we only included two major electron acceptors (O<sub>2</sub> and NO<sub>3</sub><sup>-</sup>) and used the ratio of these  
589 two electron acceptors to infer energy contribution of electron donors at different oxidative conditions.

590

591 Microbial genome replication starts directionally from a single origin<sup>31</sup>. Based on metagenomic  
592 mapping, at a single time-point the coverage ratio between the replicating origin and terminus of a  
593 microbial genome can be used as a proxy to represent the replication rate/growth rate<sup>30,32</sup>. Growth rate  
594 for each MAG was calculated by iRep v1.10<sup>30</sup> with default settings. MAGs that are from the same  
595 environments were pooled together as the input genomes. Sam files that were generated by

596 metagenomic mapping described above were used as the iRep input. Barcharts that reflect the growth  
597 rate and significant difference test result (by *t*-test) of MAG taxonomic groups were generated using  
598 R package ‘*ggplot2*’ and ‘*PairedData*’.

599

### 600 **Network complexity analysis**

601 For each community, a bipartite network was built based on reaction/substrate relationships and the  
602 percent energy yields for each reaction. Briefly, the plume chemical reaction table for each reaction  
603 was stored; within the table, the substrate and product for a reaction were recorded<sup>39</sup>. Then, for each  
604 community, reactions (represented as one set of nodes in the bipartite network) with different percent  
605 energy yields were connected with substrates and products in the network (represented as the second  
606 set of nodes) via directed edges between both sets of nodes. The energy yields are based on the result  
607 from “Bioenergetic and thermodynamic modeling” and are represented on the network as node size  
608 proportional to the percent energy yield. These networks were constructed using the Python package  
609 ‘*networkx*’<sup>80</sup> (<https://networkx.org/>).

610

611 The network complexity change as a function of reaction energy yield was calculated by the following  
612 steps<sup>40</sup>. For each plume community network, the complexity of the network’s structure was measured.  
613 A node was taken from the network; as a consequence, the change in complexity ( $\Delta C$ ) before and after  
614 the node was taken was calculated accordingly. The  $\Delta C$  was assigned to that node as a property  
615 representing that node’s contribution to the network’s overall complexity. Then this node was placed  
616 back and these steps were repeated for each reaction node<sup>40</sup>.

617

618 In this study, complexity (*C*) was calculated by estimating the algorithmic complexity. Because  
619 algorithmic complexity cannot be directly computed, we used an estimate known as the Block  
620 Decomposition Method (BDM)<sup>41</sup>. The perturbation analysis to calculate each node’s complexity  
621 contribution ( $\Delta C$ ) is called Minimal Information Loss Selection, MILS<sup>32</sup>; in this study, successive edge  
622 deletion was replaced as node deletion which also works with good performance<sup>33</sup>. This method has  
623 been used to characterize complex properties of biological networks and is proven to be a good  
624 measure among many other algorithms<sup>40, 41</sup>. For all reaction nodes in each community plume reaction  
625 network, we conducted this measurement for each reaction node and came up with the scatterplots.

626

### 627 **Community-level metabolic analysis**

628 Resulted MAGs and plume metagenomic reads were used to conduct community-level metabolic  
629 analysis using METABOLIC-C v4.0<sup>35</sup> with default settings. For Guaymas Basin, Mid-Cayman Rise,  
630 and Lau Basin sites, all MAGs and plume metagenomic reads from each site were used separately.  
631 From METABOLIC-C regular MW-score results, a group of metabolic cycling steps that are important  
632 in reflecting the plume substrate metabolisms were specifically selected to make functional network  
633 diagrams (using R script ‘*draw\_functional\_network.R*’ from METABOLIC-C). For each site, MW-  
634 score table and functional network diagram (based on both all and selected metabolic steps) were  
635 generated, respectively.

636

## 637 Evolution analysis

638 Metagenomic reads from mesopelagic *Tara* Ocean metagenomic datasets (with > 800m depth)<sup>45</sup> were  
639 used as the regular ocean environment representatives to compare microdiversity characteristics with  
640 that of hydrothermal environments from this study. To simplify analyses, *Tara* Ocean reads from  
641 samples collected by filtration with various filter sizes at each station were pooled as one to represent  
642 all reads from that station. Both *Tara* Ocean reads and hydrothermal environment reads (including  
643 both background and plume environments; background and plume reads were also pooled together  
644 individually to simplify analyses and satisfy coverage requirement of each MAG) from this study were  
645 first mapped to hydrothermal environment MAGs recovered from individual sites by Bowtie 2<sup>56</sup> with  
646 default settings. After mapping, reads within resulted bam files were filtered according to the following  
647 rules to calculate downstream microdiversity parameters: (1) minimum percent identity of read pairs  
648 to reference > 95%; (2) maximum insert size between two reads < 3× median insert size and minimum  
649 insert size > 50bp (so only paired reads are retained). Filter steps were either conducted by inStrain  
650 v1.4.1<sup>42</sup> or inStrain\_lite v0.4.0<sup>81</sup> (for generating bam files) with the same rules. Software inStrain was  
651 further employed to calculate microdiversity parameters for each MAG in individual sites from this  
652 study. Subsequently, interested parameters<sup>42</sup> were picked and parsed accordingly from resulted folders,  
653 including ‘coverage’ (average coverage depth of all scaffolds of one genome), ‘breadth minCov’  
654 (percentage of bases in the scaffold that have at least ‘min\_cov’ coverage), ‘SNV count / (breadth  
655 minCov × length)’ (total number of SNVs called on one genome normalized by genome length and  
656 breadth minCov), ‘N/S SNV ratio’ (nonsynonymous to synonymous SNV ratio of one genome),  
657 ‘r<sup>2</sup>\_mean’ (r<sup>2</sup> mean between linked SNVs), ‘con freq mean’ (mean value of fraction of reads supporting  
658 the consensus base within one genome), ‘con freq mean for N SNV’ (mean value of con freq on all  
659 nonsynonymous SNV sites), and ‘con freq mean for S SNV’ (mean value of con freq on all  
660 synonymous SNV sites). MAGs that have breadth\_minCov value < 50% or do not pass the ‘min\_cov’  
661 requirement by inStrain were removed from microdiversity analysis in each site.

662  
663 In order to identify gene-specific selective sweep in hydrothermal environment, we further pooled  
664 reads together into two categories, one contains hydrothermal environment datasets (including both  
665 background and plume environment datasets) and the other contains *Tara* Ocean samples (all *Tara*  
666 Ocean sample datasets are pooled together). After reads mapping and filtering as described above,  $F_{ST}$   
667 (fixation index) between hydrothermal and *Tara* Ocean environments was calculated using scikit-allel  
668 package<sup>82</sup> (Hudson method<sup>83</sup>) within inStrain\_lite to identify genes with skewed allele frequencies  
669 across the whole genome. Subsequently, high  $F_{ST}$  genes from each MAG within each hydrothermal  
670 vent site were identified if they have  $F_{ST}$  value >  $F_{ST}$  mean (genome-wide  $F_{ST}$  average) +  $2.5 \times F_{ST}$  std  
671 (genome-wide  $F_{ST}$  standard deviation) and the lowest gene coverage in either hydrothermal and *Tara*  
672 Ocean environment samples should be higher than 5×. Meanwhile, for each genome the number of  
673 genes with empty  $F_{ST}$  value should not be more than half of all genes, otherwise high  $F_{ST}$  genes will  
674 not be taken into account for this genome. We set gene coverage in both environments to be at least  
675 5× due to the fact that reduction of gene coverage (or loss of coverage in some genome regions) can  
676 also lead to low nucleotide diversity. Furthermore, to confirm that these genes are specifically selected  
677 in hydrothermal environment, additional requirements were added: (1) gene nucleotide diversity in  
678 hydrothermal environment < nucleotide diversity genome average in hydrothermal environment; (2)

679 gene N/S SNV ratio in hydrothermal environment > N/S SNV ratio genome average in hydrothermal  
680 environment; (3) gene nucleotide diversity in hydrothermal environment < gene nucleotide diversity  
681 in *Tara* Ocean samples; (4) gene N/S SNV ratio in hydrothermal environment > gene N/S SNV ratio  
682 in *Tara* Ocean samples.

683

684 To find sulfur metabolizing genes that have signals of being fixed after migration, a relatively less  
685 stringent set of criteria were used to screen gene  $F_{ST}$  values compared to high  $F_{ST}$  gene identification  
686 method in the above paragraph. For each sulfur metabolizing gene (including genes of *sat*, *aprA*, *sdo*,  
687 oxidative *dsrAB*, and *soxBCY*) containing MAGs, the identified genes should meet the following  
688 criteria: (1)  $F_{ST}$  value >  $F_{ST}$  mean (genome-wide  $F_{ST}$  average) and both  $F_{ST}$  and  $F_{ST}$  mean should be  
689 positive values; (2) gene nucleotide diversity in hydrothermal environment < gene nucleotide diversity  
690 in *Tara* Ocean samples; (3) gene N/S SNV ratio in hydrothermal environment > gene N/S SNV ratio  
691 in *Tara* Ocean samples; (4) gene coverages in hydrothermal environments and *Tara* Ocean samples  
692 both > 5×. Sulfur metabolizing genes that meet all the four criteria were indicated to have positive  
693 gene fixation signals though the selective power across the genome did not reach the level of gene-  
694 specific selective sweeps as indicated by the above method.



## 695 **Figure Captions**

696 **Fig. 1 | Sampling sites, distribution, and metabolic profile of the core plume microbiome. a**  
697 Sampling site maps of hydrothermal plume samples from which the 16S rRNA gene datasets were  
698 sourced. Numbers in brackets indicate dataset quantities. Three hydrothermal sites that have  
699 metagenome and metatranscriptome datasets in this study were specifically represented by inset maps.  
700 Ocean maps were remodified from ArcGIS online map (containing layers of “World Ocean Base” and  
701 “World Ocean Reference”; <https://www.arcgis.com/>). **b** Membership and distribution of the core plume  
702 microbiome. Heatmap shows the presence/absence of core plume microbial groups (tracing back to  
703 known taxonomic ranks from the genus-level taxa) in 37 hydrothermal plume 16S rRNA gene datasets  
704 across the world. **c** Metabolic profile of the core plume microbiome. From this study, MAGs that have  
705 16S rRNA genes affiliated to the core plume microbiome were used as representatives (numbers  
706 labeled in brackets). This subpanel shows the presence or absence of metabolic potential associated  
707 with sulfur, carbon, nitrogen, hydrogen, and metal biogeochemical transformations.

708  
709 **Fig. 2 | Thermodynamic estimation of available free energies and biomass yields from electron**  
710 **donors, metagenomics-based contribution of electron donors to energy, and growth rates of**  
711 **major microbial contributors. a** Thermodynamic estimation diagram of available free energy and  
712 biomass. For each hydrothermal environment, the contribution fraction of each electron donor species  
713 was labeled accordingly in the rings. The total available free energies and biomass were labeled  
714 accordingly to individual plumes. Two temperatures (3°C and 4.9°C) were picked to represent *in situ*  
715 temperatures in the upper and lower plume. Light yellow represents aerobic sulfur oxidation, dark  
716 yellow represents anaerobic sulfur oxidation. **b** Metagenomics-based estimation of energy contribution.  
717 Energy contribution for each electron donor was calculated based on metagenomic abundance of each  
718 reaction of electron donors and free energy yield of each reaction. The contribution ratio of electron  
719 donor species was calculated for individual environments respectively. **c** Growth rate of major  
720 microbial contributors in each hydrothermal environment. The y-axis for each barplot indicates the  
721 replication rate. The microbial groups starting with “ $\alpha$ -”, “ $\gamma$ -”, and “ $\delta$ -” represent Alphaproteobacteria,  
722 Gammaproteobacteria, and Deltaproteobacteria, respectively. Plume microbial groups were colored by  
723 dark yellow, background microbial groups were colored by light yellow and they were also all labeled  
724 with “(P)” or “(B)”, respectively. Numbers in brackets indicate MAG numbers in each microbial group.  
725 Star-labeled plume microbial groups had higher growth rates than the ‘Rest’ plume microbial groups.

726  
727 **Fig. 3 | Sulfur metabolism and metabolic plasticity of sulfur oxidizers. a** Details of sulfur  
728 metabolism pathways in the hydrothermal plume. The gene abundance (coverage normalized by 100M  
729 reads) and transcript expression level (TPM) for each step were calculated based on plume  
730 metagenomic and metatranscriptomic read mapping results. Log<sub>10</sub>-transformed values of gene  
731 abundance and transcript expression level were labeled accordingly in the diagram. **b** Major  
732 contributors to sulfur metabolizing genes. For each sulfur metabolizing gene, microbial groups that  
733 occupied > 10% of the total gene abundance (by metagenome) or transcript expression (by  
734 metatranscriptome) values were labeled in the diagram. For some genes with only three or less than  
735 three contributors, all contributors were labeled. **c** Metabolic plasticity of sulfur oxidizers. For each  
736 hydrothermal vent site, three parameters were given to show the metabolic plasticity of sulfur oxidizers  
737 in conducting each electron transferring reaction related to carbon, nitrogen, hydrogen, and metal

738 biogeochemical cyclings: the number of sulfur-oxidizing gene containing MAGs, gene abundance  
739 percentage, and transcript abundance percentage.

740

741 **Fig. 4 | Network complexity, MW-scores (metabolic weight scores), and functional network**  
742 **diagrams of the three hydrothermal vent sites. a** Network complexity diagram representing each  
743 reaction's influence on the complexity of the network. In the figure, different colors represent different  
744 hydrothermal environments, different symbol shapes represent different reactions. The substrates  
745 (including electron donors and acceptors) were listed for each reaction in the legend. The x-axis is the  
746 change in complexity ( $\Delta C$ ) of the whole network for a node (a reaction here) and the y-axis is the  
747 percent energy yield of that reaction in the whole community. This network complexity diagram was  
748 based on thermodynamic estimation results at 3°C. **b** MW-scores of three major energy contributing  
749 reactions. **c** Functional network diagram of Guaymas Basin. **d** Functional network diagram of Mid-  
750 Cayman Rise. **e** Functional network diagram of Lau Basin. A group of metabolic cycling steps that  
751 are important in reflecting the plume substrate metabolisms were selected from METABOLIC-C  
752 regular MW-score results to make these functional network diagrams (**c**, **d**, **e**), respectively. In each  
753 functional network diagram, the size of a node is proportional to gene coverage associated with the  
754 metabolic/biogeochemical cycling step. The thickness of the edge represents the average gene  
755 coverage values of the two connected metabolic/biogeochemical cycling steps. Edges related to two  
756 reactions of sulfur oxidation were colored accordingly in each diagram.

757

758 **Fig. 5 | Evolutionary mechanism of plume microbial populations during migration. a** Schematic  
759 diagram showing the changing trend of microdiversity parameters during migration. Individual solid  
760 dots with various colors represent microbial populations. Two scenarios were depicted in this panel:  
761 unrepresentative strains and strains that have detectable read mapping results in both environments. **b**  
762 Two representative charts showing  $F_{ST}$  distribution in MAGs that contain high  $F_{ST}$  genes. In each chart,  
763 the x-axis represents gene numbers (only genes with detectable  $F_{ST}$ ; negative values were removed).  
764 Dot sizes were proportional to SNV numbers in individual genes, and  $F_{ST}$  genome-wide mean was  
765 depicted in each chart with dash lines. Red-colored dots represent high  $F_{ST}$  genes that also passed the  
766 requirements of  $F_{ST}$ , nucleotide diversity, N/S SNV ratios, and coverages (see methods). The  
767 nucleotide diversity and N/S SNV ratio distribution for high  $F_{ST}$  genes and genome-wide mean of all  
768 genes in different environments were depicted in the chart on the right side. Details of high  $F_{ST}$  genes  
769 and related parameters in individual genomes (all hits, also including these two representative genomes)  
770 were listed in [Supplementary Data 12](#). **c** Two representative charts showing  $F_{ST}$  distribution in MAGs  
771 that contain sulfur metabolizing genes with signals of being fixed. In each chart, the x-axis represents  
772 gene numbers (only genes with detectable  $F_{ST}$ ; negative values were removed). Dot sizes were  
773 proportional to SNV numbers in individual genes, and  $F_{ST}$  genome-wide mean was depicted in each  
774 chart with dash lines. Red-colored dots represent sulfur metabolizing genes that passed the  
775 requirements of  $F_{ST}$ , nucleotide diversity, N/S SNV ratios, and coverages (see methods). The  
776 nucleotide diversity and N/S SNV ratio distribution for sulfur metabolizing genes in different  
777 environments were depicted in the chart on the right side. Details of sulfur metabolizing genes with  
778 signals of being fixed and related parameters in individual genomes (all hits, also including these two  
779 representative genomes) were listed in [Supplementary Data 13](#). **d** Frame diagram showing the  
780 underlying evolutionary processes during migration. Circles represent microbial populations. Dash  
781 line arrows indicate the direction of the next evolutionary step.

782  
783

## 784 **References**

- 785 1. Dick G, Anantharaman K, Baker B, Li M, Reed D, Sheik C. The microbiology of deep-sea hydrothermal vent  
786 plumes: ecological and biogeographic linkages to seafloor and water column habitats. *Front Microbio* **4**, 1-16  
787 (2013).  
788
- 789 2. Dick GJ. The microbiomes of deep-sea hydrothermal vents: distributed globally, shaped locally. *Nat Rev*  
790 *Microbiol* **17**, 271-283 (2019).  
791
- 792 3. German C, Von Damm K. Hydrothermal processes. *Treatise on geochemistry* **6**, 625 (2003).  
793
- 794 4. McCollom TM. Geochemical constraints on primary productivity in submarine hydrothermal vent plumes. *Deep*  
795 *Sea Research Part I: Oceanographic Research Papers* **47**, 85-101 (2000).  
796
- 797 5. Winn CD, Karl DM, Massoth GJ. Microorganisms in deep-sea hydrothermal plumes. *Nature* **320**, 744-746  
798 (1986).  
799
- 800 6. Zhang Y, Zhao Z, Chen C-TA, Tang K, Su J, Jiao N. Sulfur Metabolizing Microbes Dominate Microbial Communities  
801 in Andesite-Hosted Shallow-Sea Hydrothermal Systems. *PLoS One* **7**, e44593 (2012).  
802
- 803 7. Anantharaman K, Breier JA, Sheik CS, Dick GJ. Evidence for hydrogen oxidation and metabolic plasticity in  
804 widespread deep-sea sulfur-oxidizing bacteria. *Proc Natl Acad Sci U S A* **110**, 330 (2013).  
805
- 806 8. Mattes TE, *et al.* Sulfur oxidizers dominate carbon fixation at a biogeochemical hot spot in the dark ocean. *ISME*  
807 *J* **7**, 2349-2360 (2013).  
808
- 809 9. Zhou Z, *et al.* Gammaproteobacteria mediating utilization of methyl-, sulfur- and petroleum organic  
810 compounds in deep ocean hydrothermal plumes. *ISME J* **14**, 3136-3148 (2020).  
811
- 812 10. Anantharaman K, Breier JA, Dick GJ. Metagenomic resolution of microbial functions in deep-sea hydrothermal  
813 plumes across the Eastern Lau Spreading Center. *ISME J* **10**, 225 (2015).  
814
- 815 11. Lesniewski RA, Jain S, Anantharaman K, Schloss PD, Dick GJ. The metatranscriptome of a deep-sea  
816 hydrothermal plume is dominated by water column methanotrophs and lithotrophs. *ISME J* **6**, 2257 (2012).  
817
- 818 12. Anantharaman K, *et al.* Thousands of microbial genomes shed light on interconnected biogeochemical  
819 processes in an aquifer system. *Nat Commun* **7**, 13219 (2016).  
820
- 821 13. Baker BJ, Lazar CS, Teske AP, Dick GJ. Genomic resolution of linkages in carbon, nitrogen, and sulfur cycling  
822 among widespread estuary sediment bacteria. *Microbiome* **3**, 14 (2015).  
823
- 824 14. Li M, Baker BJ, Anantharaman K, Jain S, Breier JA, Dick GJ. Genomic and transcriptomic evidence for scavenging

- 825 of diverse organic compounds by widespread deep-sea archaea. *Nat Commun* **6**, 8933 (2015).  
826
- 827 15. Dombrowski N, Teske AP, Baker BJ. Expansive microbial metabolic versatility and biodiversity in dynamic  
828 Guaymas Basin hydrothermal sediments. *Nat Commun* **9**, 4999 (2018).  
829
- 830 16. Anantharaman K, Duhaime MB, Breier JA, Wendt K, Toner BM, Dick GJ. Sulfur Oxidation Genes in Diverse Deep-  
831 Sea Viruses. *Science* **344**, 757-760 (2014).  
832
- 833 17. Sheik CS, Jain S, Dick GJ. Metabolic flexibility of enigmatic SAR324 revealed through metagenomics and  
834 metatranscriptomics. *Environ Microbiol* **16**, 304-317 (2013).  
835
- 836 18. Li M, Toner BM, Baker BJ, Breier JA, Sheik CS, Dick GJ. Microbial iron uptake as a mechanism for dispersing iron  
837 from deep-sea hydrothermal vents. *Nat Commun* **5**, 3192 (2014).  
838
- 839 19. Li M, Jain S, Dick GJ. Genomic and Transcriptomic Resolution of Organic Matter Utilization Among Deep-Sea  
840 Bacteria in Guaymas Basin Hydrothermal Plumes. *Front Microbio* **7**, 1-13 (2016).  
841
- 842 20. Sjöqvist C, Delgado LF, Alneberg J, Andersson AF. Ecologically coherent population structure of uncultivated  
843 bacterioplankton. *ISME J* **15**, 3034-3049 (2021).  
844
- 845 21. Larkin AA, *et al.* Subtle biogeochemical regimes in the Indian Ocean revealed by spatial and diel frequency of  
846 *Prochlorococcus* haplotypes. *Limnol Oceanogr* **65**, S220-S232 (2020).  
847
- 848 22. Anderson RE, *et al.* Genomic variation in microbial populations inhabiting the marine seafloor at deep-sea  
849 hydrothermal vents. *Nat Commun* **8**, 1114 (2017).  
850
- 851 23. Galambos D, Anderson RE, Reveillaud J, Huber JA. Genome-resolved metagenomics and metatranscriptomics  
852 reveal niche differentiation in functionally redundant microbial communities at deep-sea hydrothermal vents.  
853 *Environ Microbiol*, (2019).  
854
- 855 24. Meier DV, *et al.* Niche partitioning of diverse sulfur-oxidizing bacteria at hydrothermal vents. *ISME J* **11**, 1545  
856 (2017).  
857
- 858 25. Dick GJ, Tebo BM. Microbial diversity and biogeochemistry of the Guaymas Basin deep-sea hydrothermal  
859 plume. *Environ Microbiol* **12**, 1334-1347 (2010).  
860
- 861 26. Sheik CS, Anantharaman K, Breier JA, Sylvan JB, Edwards KJ, Dick GJ. Spatially resolved sampling reveals  
862 dynamic microbial communities in rising hydrothermal plumes across a back-arc basin. *ISME J* **9**, 1434 (2014).  
863
- 864 27. Reed DC, *et al.* Predicting the response of the deep-ocean microbiome to geochemical perturbations by  
865 hydrothermal vents. *ISME J* **9**, 1857-1869 (2015).  
866
- 867 28. Flores GE, *et al.* Inter-field variability in the microbial communities of hydrothermal vent deposits from a back-  
868 arc basin. *Geobiology* **10**, 333-346 (2012).

- 869
- 870 29. Mottl MJ, *et al.* Chemistry of hot springs along the Eastern Lau Spreading Center. *Geochim Cosmochim Acta* **75**,
- 871 1013-1038 (2011).
- 872
- 873 30. Brown CT, Olm MR, Thomas BC, Banfield JF. Measurement of bacterial replication rates in microbial
- 874 communities. *Nat Biotechnol* **34**, 1256 (2016).
- 875
- 876 31. Prescott DM, Kuempel PL. Bidirectional Replication of the Chromosome in *Escherichia coli*. *Proc Natl Acad Sci U*
- 877 *S A* **69**, 2842-2845 (1972).
- 878
- 879 32. Korem T, *et al.* Growth dynamics of gut microbiota in health and disease inferred from single metagenomic
- 880 samples. *Science* **349**, 1101-1106 (2015).
- 881
- 882 33. Breuer C, Pichler T. Arsenic in marine hydrothermal fluids. *Chem Geol* **348**, 2-14 (2013).
- 883
- 884 34. Simoneit BRT, Kawka OE, Brault M. Origin of gases and condensates in the Guaymas Basin hydrothermal system
- 885 (Gulf of California). *Chem Geol* **71**, 169-182 (1988).
- 886
- 887 35. Zhou Z, *et al.* METABOLIC: high-throughput profiling of microbial genomes for functional traits, metabolism,
- 888 biogeochemistry, and community-scale functional networks. *Microbiome* **10**, 33 (2022).
- 889
- 890 36. Fru EC, *et al.* Arsenic and high affinity phosphate uptake gene distribution in shallow submarine hydrothermal
- 891 sediments. *Biogeochemistry* **141**, 41-62 (2018).
- 892
- 893 37. Mattes TE, Ingalls AE, Burke S, Morris RM. Metabolic flexibility of SUP05 under low DO growth conditions.
- 894 *Environ Microbiol* **23**, 2823-2833 (2020).
- 895
- 896 38. Swan BK, *et al.* Potential for chemolithoautotrophy among ubiquitous bacteria lineages in the dark ocean.
- 897 *Science* **333**, 1296-1300 (2011).
- 898
- 899 39. Montañez R, Medina MA, Solé RV, Rodríguez-Caso C. When metabolism meets topology: Reconciling
- 900 metabolite and reaction networks. *Bioessays* **32**, 246-256 (2010).
- 901
- 902 40. Zenil H, Kiani NA, Abrahão FS, Rueda-Toicen A, Zea AA, Tegnér J. Minimal Algorithmic Information Loss
- 903 Methods for Dimension Reduction, Feature Selection and Network Sparsification. *arXiv*, arXiv:1802.05843
- 904 (2018).
- 905
- 906 41. Zenil H, Kiani NA, Tegnér J. A Review of Graph and Network Complexity from an Algorithmic Information
- 907 Perspective. *Entropy* **20**, 551 (2018).
- 908
- 909 42. Olm MR, Crits-Christoph A, Bouma-Gregson K, Firek BA, Morowitz MJ, Banfield JF. inStrain profiles population
- 910 microdiversity from metagenomic data and sensitively detects shared microbial strains. *Nat Biotechnol* **39**, 727-
- 911 736 (2021).
- 912

- 913 43. Simmons SL, DiBartolo G, Denev VJ, Goltsman DSA, Thelen MP, Banfield JF. Population Genomic Analysis of  
914 Strain Variation in Leptospirillum Group II Bacteria Involved in Acid Mine Drainage Formation. *PLoS Biol* **6**, e177  
915 (2008).  
916
- 917 44. Eppley JM, Tyson GW, Getz WM, Banfield JF. Genetic Exchange Across a Species Boundary in the Archaeal  
918 Genus *Ferroplasma*. *Genetics* **177**, 407 (2007).  
919
- 920 45. Pesant S, *et al.* Open science resources for the discovery and analysis of Tara Oceans data. *Sci Data* **2**, 150023  
921 (2015).  
922
- 923 46. Meirmans PG, Hedrick PW. Assessing population structure:  $F_{ST}$  and related measures. *Mol Ecol Resour* **11**, 5-18  
924 (2011).  
925
- 926 47. Gonnella G, *et al.* Endemic hydrothermal vent species identified in the open ocean seed bank. *Nat Microbiol* **1**,  
927 16086 (2016).  
928
- 929 48. Lennon JT, Jones SE. Microbial seed banks: the ecological and evolutionary implications of dormancy. *Nat Rev*  
930 *Microbiol* **9**, 119-130 (2011).  
931
- 932 49. Breier JA, *et al.* A suspended-particle rosette multi-sampler for discrete biogeochemical sampling in low-  
933 particle-density waters. *Deep Sea Research Part I* **56**, 1579-1589 (2009).  
934
- 935 50. Fortunato CS, Larson B, Butterfield DA, Huber JA. Spatially distinct, temporally stable microbial populations  
936 mediate biogeochemical cycling at and below the seafloor in hydrothermal vent fluids. *Environ Microbiol* **20**,  
937 769-784 (2017).  
938
- 939 51. Reveillaud J, *et al.* Subseafloor microbial communities in hydrogen-rich vent fluids from hydrothermal systems  
940 along the Mid-Cayman Rise. *Environ Microbiol* **18**, 1970-1987 (2016).  
941
- 942 52. Magoc T, Salzberg SL. FLASH: fast length adjustment of short reads to improve genome assemblies.  
943 *Bioinformatics* **27**, 2957-2963 (2011).  
944
- 945 53. Caporaso JG, *et al.* QIIME allows analysis of high-throughput community sequencing data. *Nat Methods* **7**, 335-  
946 336 (2010).  
947
- 948 54. Quast C, *et al.* The SILVA ribosomal RNA gene database project: improved data processing and web-based tools.  
949 *Nucleic Acids Res* **41**, D590-D596 (2013).  
950
- 951 55. Li D, Liu C-M, Luo R, Sadakane K, Lam T-W. MEGAHIT: an ultra-fast single-node solution for large and complex  
952 metagenomics assembly via succinct *de Bruijn* graph. *Bioinformatics* **31**, 1674-1676 (2015).  
953
- 954 56. Langmead B, Salzberg SL. Fast gapped-read alignment with Bowtie 2. *Nat Methods* **9**, 357 (2012).  
955
- 956 57. Kang DD, Froula J, Egan R, Wang Z. MetaBAT, an efficient tool for accurately reconstructing single genomes from

- 957 complex microbial communities. *PeerJ* **3**, e1165 (2015).
- 958
- 959 58. Sieber CM, *et al.* Recovery of genomes from metagenomes via a dereplication, aggregation and scoring  
960 strategy. *Nat Microbiol* **3**, 836-843 (2018).
- 961
- 962 59. Parks DH, Imelfort M, Skennerton CT, Hugenholtz P, Tyson GW. CheckM: assessing the quality of microbial  
963 genomes recovered from isolates, single cells, and metagenomes. *Genome Res* **25**, 1043-1055 (2015).
- 964
- 965 60. Parks DH, *et al.* Recovery of nearly 8,000 metagenome-assembled genomes substantially expands the tree of  
966 life. *Nat Microbiol* **2**, 1533-1542 (2017).
- 967
- 968 61. Laczny CC, *et al.* VizBin-an application for reference-independent visualization and human-augmented binning  
969 of metagenomic data. *Microbiome* **3**, 1 (2015).
- 970
- 971 62. Chaumeil P-A, Mussig AJ, Hugenholtz P, Parks DH. GTDB-Tk: a toolkit to classify genomes with the Genome  
972 Taxonomy Database. *Bioinformatics* **36**, 1925-1927 (2020).
- 973
- 974 63. Lowe TM, Chan PP. tRNAscan-SE On-line: integrating search and context for analysis of transfer RNA genes.  
975 *Nucleic Acids Res* **44**, W54-W57 (2016).
- 976
- 977 64. Seemann T. Prokka: rapid prokaryotic genome annotation. *Bioinformatics* **30**, 2068-2069 (2014).
- 978
- 979 65. Eddy SR. Accelerated Profile HMM Searches. *PLoS Comput Biol* **7**, e1002195 (2011).
- 980
- 981 66. Buchfink B, Xie C, Huson DH. Fast and sensitive protein alignment using DIAMOND. *Nat Methods* **12**, 59-60  
982 (2015).
- 983
- 984 67. Zhang H, *et al.* dbCAN2: a meta server for automated carbohydrate-active enzyme annotation. *Nucleic Acids*  
985 *Res* **46**, W95-W101 (2018).
- 986
- 987 68. Rawlings ND, Barrett AJ, Finn R. Twenty years of the MEROPS database of proteolytic enzymes, their substrates  
988 and inhibitors. *Nucleic Acids Res* **44**, D343-D350 (2016).
- 989
- 990 69. Katoh K, Standley DM. MAFFT: iterative refinement and additional methods. In: *Multiple Sequence Alignment*  
991 *Methods*. Humana Press (2014).
- 992
- 993 70. Kearse M, *et al.* Geneious Basic: an integrated and extendable desktop software platform for the organization  
994 and analysis of sequence data. *Bioinformatics* **28**, 1647-1649 (2012).
- 995
- 996 71. Nguyen L-T, Schmidt HA, von Haeseler A, Minh BQ. IQ-TREE: a fast and effective stochastic algorithm for  
997 estimating maximum-likelihood phylogenies. *Mol Biol Evol* **32**, 268-274 (2014).
- 998
- 999 72. Letunic I, Bork P. Interactive Tree Of Life (iTOL): an online tool for phylogenetic tree display and annotation.  
1000 *Bioinformatics* **23**, 127-128 (2007).

1001

1002 73. Pruesse E, Peplies J, Gloeckner FO. SINA: Accurate high-throughput multiple sequence alignment of ribosomal  
1003 RNA genes. *Bioinformatics* **28**, 1823-1829 (2012).

1004

1005 74. Kopylova E, Noé L, Touzet H. SortMeRNA: fast and accurate filtering of ribosomal RNAs in metatranscriptomic  
1006 data. *Bioinformatics* **28**, 3211-3217 (2012).

1007

1008 75. Love MI, Huber W, Anders S. Moderated estimation of fold change and dispersion for RNA-seq data with  
1009 DESeq2. *Genome Biol* **15**, 550 (2014).

1010

1011 76. Breier J, *et al.* Sulfur, sulfides, oxides and organic matter aggregated in submarine hydrothermal plumes at  
1012 9°50'N East Pacific Rise. *Geochim Cosmochim Acta* **88**, 216-236 (2012).

1013

1014 77. Reeves EP, McDermott JM, Seewald JS. The origin of methanethiol in midocean ridge hydrothermal fluids. *Proc*  
1015 *Natl Acad Sci U S A* **111**, 5474 (2014).

1016

1017 78. Bethke CM. *Geochemical and biogeochemical reaction modeling*. Cambridge University Press (2007).

1018

1019 79. Johnson JW, Oelkers EH, Helgeson HC. SUPCRT92: A software package for calculating the standard molal  
1020 thermodynamic properties of minerals, gases, aqueous species, and reactions from 1 to 5000 bar and 0 to  
1021 1000 °C *Computers & Geosciences* **18**, 899-947 (1992).

1022

1023 80. Hagberg A, Swart P, S Chult D. Exploring network structure, dynamics, and function using NetworkX. In:  
1024 *Proceedings of the 7th Python in Science conference* (2008).

1025

1026 81. Crits-Christoph A, Olm MR, Diamond S, Bouma-Gregson K, Banfield JF. Soil bacterial populations are shaped by  
1027 recombination and gene-specific selection across a grassland meadow. *ISME J* **14**, 1834-1846 (2020).

1028

1029 82. Bhatia G, Patterson N, Sankararaman S, Price AL. Estimating and interpreting  $F_{ST}$ : the impact of rare variants.  
1030 *Genome Res* **23**, 1514-1521 (2013).

1031

1032 83. Hudson RR, Slatkin M, Maddison WP. Estimation of levels of gene flow from DNA sequence data. *Genetics* **132**,  
1033 583-589 (1992).

1034

1035
